# Supplementary material for: Exploring the state of health of electric vehicle batteries at end of use; hierarchical waste flow analysis to determine the recycling and reuse potential
Source: J Remanuf. 2024 Jan 26;14(1):155–68. doi: 10.1007/s13243-024-00137-4 (PMC10913409; doi:10.1007/s13243-024-00137-4)
Supplement: Supplementary file 1 — Supplementary file1 (XLSX 141 KB) [file 13243_2024_137_MOESM1_ESM.xlsx]

## Sheet: SOH_of_disposal
	SOH at disposal
Age of disposal	1	2	3	4	5	6	7	8	9	10	11	12
	95.2238	93.2454	91.7273	90.4475	89.32	88.3006	87.3632	86.4907	85.6713	84.8962	84.159	83.4546
	94.7	92.6	91.4561	90.0896	88.9	87.8839	86.9027	85.9256	85.0261	84.2302	83.4658	82.8772
	94.6	92.42	91.1849	89.7317	88.48	87.4671	86.4422	85.3628	84.3808	83.5641	82.7727	82.2997
	94.45	92.24	90.9137	89.3738	88.06	87.0503	85.9816	84.8	83.7356	82.8981	82.0795	81.7223
	94.3	92.06	90.6424	89.0158	87.64	86.6335	85.5211	84.2	83.0904	82.2321	81.3863	81.1449
	94.15	91.88	90.3712	88.6579	87.22	86.2168	85.0605	83.65	82.4452	81.566	80.6932	80.5674
	94	91.7	90.1	88.3	86.8	85.8	84.6	83.1	81.8	80.9	80	79.99
	93.82	91.4071	89.7714	87.9	86.3143	85.385	84.1071	82.6	81.1	80.0667	79.1667	79.1836
	93.64	91.1143	89.4429	87.5	85.8286	84.97	83.6143	82.15	80.4	79.2333	78.3333	78.3771
	93.46	90.8214	89.1143	87.1	85.3429	84.555	83.1214	81.6333	79.7	78.4	77.5	77.5707
	93.28	90.5286	88.7857	86.7	84.8571	84.14	82.6286	81.1167	79	77.7091	76.8173	76.7643
	93.1	90.2357	88.4571	86.3	84.3714	83.725	82.1357	80.6	78.3	77.0182	76.1345	75.9579
	92.8778	89.9429	88.1286	85.9	83.8857	83.31	81.6429	80	77.6	76.3273	75.4518	75.1514
	92.6556	89.65	87.8	85.5	83.4	82.895	81.15	79.4	76.9125	75.6364	74.7691	74.345
	92.4333	89.3571	87.4714	85.1	82.9143	82.48	80.6571	78.8	76.225	74.9455	74.0864	73.5386
	92.2111	89.0643	87.1429	84.7	82.4286	82.065	80.1643	78.3	75.5375	74.2545	73.4036	72.7321
	91.9889	88.7714	86.8143	84.3	81.9429	81.65	79.6714	77.8	74.85	73.5636	72.7209	71.9257
	91.7667	88.4786	86.4857	83.9	81.4571	81.235	79.1786	77.1	74.1625	72.8727	72.0382	71.1193
	91.5444	88.1857	86.1571	83.5	80.9714	80.82	78.6857	76.4	73.475	72.1818	71.3555	70.3129
	91.3222	87.8929	85.8286	83.1	80.4857	80.405	78.1929	75.7	72.7875	71.4909	70.6727	69.5064
	91.1	87.6	85.5	82.7	80	79.99	77.7	75	72.1	70.8	69.99	68.7

## Sheet: dist. of Second_life
	Converted disposal SOH to calendar life															remaining calendar life
Age of disposal	1	2	3	4	5	6	7	8	9	10	11	12		Age of disposal	1	2	3	4	5	6	7	8	9	10	11	12
	1.23134	2.40044	3.19993	4.30536	5.40097	6.4351	7.51951	8.62172	9.82877	10.9014	11.9837	12.8522			19	18	17	16	15	14	13	12	11	10	9	8
	1.27825	2.51864	3.40631	4.62194	5.81744	6.8854	8.05763	9.26671	10.694	11.8416	13.0096	13.7337			19	18	17	16	15	14	12	11	10	9	7	7
	1.35025	2.63968	3.61914	4.94978	6.24935	7.35096	8.61434	9.93498	11.5958	12.8208	14.0776	14.6444			19	18	17	16	14	13	12	11	9	8	6	6			alpha	betha
	1.42422	2.76355	3.83842	5.28884	6.69675	7.83175	9.18965	10.6265	12.5341	13.8388	15.1877	15.5843			19	18	17	15	14	13	11	10	8	7	5	5			3	9.5
	1.50016	2.89028	4.06415	5.63913	7.1596	8.32777	9.78354	11.3413	13.5088	14.8958	16.3399				19	18	16	15	13	12	11	9	7	6	4				3	9
	1.57808	3.01983	4.29632	6.00069	7.63792	8.83901	10.3961	12.0793	14.5201	15.9916					19	17	16	14	13	12	10	8	6	5					3	8.5
	1.67418	3.23669	4.58624	6.41797	8.21035	9.3632	11.0721	12.5835	15.8246						19	17	16	14	12	11	9	8	5						3	8
	1.77313	3.46108	4.88562	6.84931	8.80347	9.9025	11.7695	13.0979	17.1853						19	17	16	14	12	11	9	7	3						3	7.5
	1.87492	3.69298	5.19447	7.29469	9.41728	10.4569	12.4882	13.6226	18.6021						19	17	15	13	11	10	8	7	2						3	7
	1.97954	3.93239	5.51277	7.75409	10.0518	11.0264	13.2281	14.1577							19	17	15	13	10	9	7	6							3	6.5
	2.08701	4.17934	5.84055	8.22751	10.7069	11.611	13.9894	14.703							18	16	15	12	10	9	7	6							3	6
	2.22361	4.4338	6.17778	8.71495	11.3828	12.2107	14.7719	15.2587							18	16	14	12	9	8	6	5							3	5.5
	2.36453	4.69578	6.52449	9.21643	12.0793	12.8255	15.5758	15.8247							18	16	14	11	8	8	5	5							3	5
	2.50978	4.96527	6.88066	9.73194	12.7966	13.4553	16.4009	16.8399							18	16	14	11	8	7	4	4							3	4.5
	2.65936	5.24229	7.24629	10.2615	13.5345	14.1003	17.2474								18	15	13	10	7	6	3								3	4
	2.81328	5.52683	7.62139	10.805	14.293	14.7604									18	15	13	10	6	6
	2.97152	5.81888	8.00595	11.3626	15.0723	15.4356									18	15	12	9	5	5
	3.13409	6.11845	8.39998	11.9342	15.8723	16.1259									17	14	12	9	5	4
	3.30099	6.42554	8.80347	12.5199	16.6929	16.8314									17	14	12	8	4	4
	3.47222	6.74016	9.21643	13.1196	17.5342	17.5518									17	14	11	7	3	3
											Age	0	1	2	3	4	5	6	7	8	9	10	11	12	13	14	15	16	17	18	19	20
											1	0	0.349497	1.38662	3.05152	5.19579	7.56089	9.7913	11.4922	12.3249	12.1107	10.8996	8.96461	6.71448	4.56005	2.79423	1.5366	0.754056	0.328261	0.125996	0.0423742	0.0124077
											2	0	0.410959	1.62813	3.56904	6.03096	8.66695	11.0158	12.5965	13.0483	12.2626	10.4389	8.02138	5.53755	3.41538	1.87042	0.903553	0.382369	0.140741	0.0447284	0.012182	0.00282185
											3	0	0.487705	1.92871	4.20739	7.04247	9.9634	12.3713	13.693	13.5822	12.0731	9.58713	6.76704	4.21917	2.3072	1.09807	0.451157	0.158676	0.0473594	0.0118894	0.00248801	0.000430047
											4	0	0.584794	2.30741	5.00255	8.27341	11.4753	13.8336	14.6928	13.7955	11.4281	8.31036	5.26794	2.88715	1.35573	0.540207	0.180823	0.0503194	0.0115183	0.00214541	0.000321617	3.8376e-05
											5	0	0.709428	2.79101	6.00323	9.77627	13.219	15.342	15.4538	13.5221	10.232	6.64506	3.66893	1.70384	0.657881	0.208648	0.053674	0.011056	0.00179971	0.000228452	2.23113e-05	1.65382e-06
											6	0	0.872089	3.41789	7.27584	11.6121	15.1879	16.7741	15.7663	12.5815	8.4582	4.73874	2.18448	0.817066	0.244315	0.0575079	0.0104883	0.00145833	0.000152075	1.16977e-05	6.52696e-07	2.59758e-08
											7	0	1.08843	4.24414	8.91098	13.8449	17.3239	17.9102	15.3516	10.8363	6.22327	2.86399	1.03827	0.291118	0.0619316	0.00980055	0.0011306	9.31471e-05	5.36804e-06	2.11908e-07	5.61052e-09	9.75367e-11
											8	0	1.38247	5.35356	11.0312	16.5237	19.4661	18.394	13.9066	8.30632	3.84954	1.35533	0.354254	0.0670925	0.00897876	0.000827514	5.1168e-05	2.06727e-06	5.31345e-08	8.45788e-10	8.11548e-12	4.56822e-14
											9	0	1.79235	6.87402	13.7974	19.6378	21.2658	17.7216	11.2431	5.31767	1.82635	0.442281	0.0731918	0.00801192	0.000561066	2.42957e-05	6.28543e-07	9.38299e-09	7.80468e-11	3.49224e-13	8.11433e-16	9.4496e-19
											10	0	2.38088	9.00485	17.4039	23.013	22.0728	15.348	7.56316	2.55577	0.570021	0.080511	0.0068965	0.000342678	9.43926e-06	1.37669e-07	1.01495e-09	3.60985e-12	5.91015e-15	4.24926e-18	1.27971e-21	1.53966e-25
											11	0	3.25625	12.0619	22.0316	26.0967	20.8777	11.0751	3.74084	0.764738	0.0894567	0.00564369	0.000180646	2.75636e-06	1.8821e-08	5.39579e-11	6.09096e-14	2.53813e-17	3.65945e-21	1.71073e-25	2.42965e-30	9.82159e-36
											12	0	4.61483	16.5468	27.6672	27.591	16.6207	5.77431	1.08041	0.100639	0.00429082	7.67521e-05	5.26937e-07	1.26868e-09	9.77941e-13	2.20202e-16	1.32092e-20	1.92457e-25	6.208e-31	4.04019e-37	4.83387e-44	9.68704e-52

## Sheet: Delayed_recycling
	EOL_STOCK
AGE of disposal	2011	2012	2013	2014	2015	2016	2017	2018	2019	2020	2021	2022	2023	2024	2025	2026	2027	2028	2029	2030	2031	2032	2033	2034	2035	2036	2037	2038	2039	2040	2041	2042	2043	2044	2045	2046	2047	2048	2049	2050
1	0.21262	0.521716	1.48198	0.481901	2.17678	4.50087	3.5967	5.2573	9.96394	22.1788	21.3079	13.3159	21.6936	35.3316	56.219	85.6139	111.359	126.39	141.945	130.239	144.937	144.662	144.379	144.089	143.792	143.487	168.544	193.808	219.278	244.955	270.839	303.029	335.482	368.198	401.178	434.42	457.382	480.529	503.862	527.38
2	0	0.559692	1.37456	3.90782	1.27173	5.7488	11.895	9.51187	13.9124	26.3835	58.761	56.4844	35.3172	57.5654	93.7991	149.319	227.49	296.022	336.108	377.617	347.244	386.43	385.697	384.944	384.171	383.377	382.564	449.372	516.73	584.639	653.099	722.111	807.936	894.463	981.691	1069.62	1158.25	1219.47	1281.19	1343.4
3	0	0	1.03088	2.53654	7.22414	2.35493	10.6624	22.0953	17.6938	25.9148	49.2085	109.731	105.603	66.1022	107.858	175.925	280.324	427.471	556.735	632.656	711.356	657.239	731.407	730.019	728.594	727.13	725.629	724.09	850.538	978.028	1106.56	1236.14	1366.76	1529.2	1692.97	1858.07	2024.5	2192.25	2308.13	2424.94
4	0	0	0	1.46818	3.62383	10.3512	3.38371	15.3608	31.9113	25.6151	37.6009	71.5513	159.878	154.16	96.6739	158.017	258.168	412.028	629.262	820.733	933.946	1051.51	979.136	1089.63	1087.56	1085.44	1083.26	1081.02	1078.73	1267.11	1457.04	1648.53	1841.57	2036.16	2278.16	2522.15	2768.11	3016.04	3265.96	3438.59
5	0	0	0	0	1.83174	4.54177	13.029	4.27639	19.4879	40.6328	32.7285	48.2002	92.0065	206.192	199.378	125.364	205.435	336.456	538.216	823.798	1076.73	1227.73	1384.94	1304.36	1451.56	1448.8	1445.97	1443.07	1440.09	1437.04	1687.99	1941.01	2196.1	2453.26	2712.48	3034.87	3359.89	3687.55	4017.85	4350.77
6	0	0	0	0	0	2.06578	5.15356	14.87	4.90744	22.48	47.1022	38.1166	56.3842	108.081	243.185	236.042	148.955	244.934	402.462	645.819	991.448	1299.55	1485.83	1680.46	1607.19	1788.56	1785.16	1781.68	1778.1	1774.43	1770.66	2079.87	2391.64	2705.95	3022.81	3342.22	3739.46	4139.94	4543.67	4950.64
7	0	0	0	0	0	0	2.11919	5.32862	15.49	5.14816	23.7403	50.0579	40.7515	60.6252	116.839	264.24	257.732	163.399	269.874	445.312	717.454	1105.65	1454.55	1668.87	1893.79	1847.3	2055.77	2051.87	2047.86	2043.75	2039.53	2035.2	2390.61	2748.95	3110.22	3474.42	3841.56	4298.14	4758.45	5222.49
8	0	0	0	0	0	0	0	2.01776	5.12334	15.0312	5.03945	23.4317	49.795	40.8392	61.1846	118.708	270.177	265.118	169.05	280.74	465.666	753.988	1167.48	1542.87	1777.88	2025.87	2025.04	2253.57	2249.29	2244.9	2240.39	2235.76	2231.02	2620.62	3013.44	3409.47	3808.72	4211.17	4711.68	5216.29
9	0	0	0	0	0	0	0	0	1.48042	3.80349	11.2838	3.82308	17.9539	38.5158	31.8725	48.1579	94.1899	216.023	213.529	137.102	229.192	382.563	623.159	970.443	1289.51	1493.71	1710.58	1761.07	1959.8	1956.08	1952.26	1948.34	1944.32	1940.2	2279.01	2620.63	2965.03	3312.23	3662.23	4097.49
10	0	0	0	0	0	0	0	0	0	1.12999	2.94383	8.849	3.03565	14.4247	31.2916	26.1695	39.9394	78.8633	182.516	181.968	117.799	198.466	333.746	547.509	858.423	1148.05	1338.09	1541.43	1643.19	1828.63	1825.16	1821.59	1817.93	1814.18	1810.33	2126.47	2445.22	2766.57	3090.53	3417.1
11	0	0	0	0	0	0	0	0	0	0	0.78022	2.06575	6.30509	2.19443	10.571	23.2306	19.668	30.3689	60.6327	141.808	142.803	93.3289	158.671	269.142	445.178	703.489	947.93	1112.79	1290.71	1432.78	1594.47	1591.44	1588.33	1585.14	1581.87	1578.51	1854.17	2132.1	2412.3	2694.78
12	0	0	0	0	0	0	0	0	0	0	0	0.481898	1.29975	4.03718	1.42856	6.99031	15.5916	13.3876	20.9493	42.36	100.273	102.141	67.4863	115.934	198.606	331.624	528.788	718.682	850.636	994.425	1156.31	1286.8	1284.36	1281.85	1279.27	1276.63	1273.93	1496.39	1720.69	1946.83
AGE of disposal			second_life_dist
1	0	0.349497	1.38662	3.05152	5.19579	7.56089	9.7913	11.4922	12.3249	12.1107	10.8996	8.96461	6.71448	4.56005	2.79423	1.5366	0.754056	0.328261	0.125996	0.0423742	0.0124077
2	0	0.410959	1.62813	3.56904	6.03096	8.66695	11.0158	12.5965	13.0483	12.2626	10.4389	8.02138	5.53755	3.41538	1.87042	0.903553	0.382369	0.140741	0.0447284	0.012182	0.00282185
3	0	0.487705	1.92871	4.20739	7.04247	9.9634	12.3713	13.693	13.5822	12.0731	9.58713	6.76704	4.21917	2.3072	1.09807	0.451157	0.158676	0.0473594	0.0118894	0.00248801	0.000430047
4	0	0.584794	2.30741	5.00255	8.27341	11.4753	13.8336	14.6928	13.7955	11.4281	8.31036	5.26794	2.88715	1.35573	0.540207	0.180823	0.0503194	0.0115183	0.00214541	0.000321617	3.8376e-05
5	0	0.709428	2.79101	6.00323	9.77627	13.219	15.342	15.4538	13.5221	10.232	6.64506	3.66893	1.70384	0.657881	0.208648	0.053674	0.011056	0.00179971	0.000228452	2.23113e-05	1.65382e-06
6	0	0.872089	3.41789	7.27584	11.6121	15.1879	16.7741	15.7663	12.5815	8.4582	4.73874	2.18448	0.817066	0.244315	0.0575079	0.0104883	0.00145833	0.000152075	1.16977e-05	6.52696e-07	2.59758e-08
7	0	1.08843	4.24414	8.91098	13.8449	17.3239	17.9102	15.3516	10.8363	6.22327	2.86399	1.03827	0.291118	0.0619316	0.00980055	0.0011306	9.31471e-05	5.36804e-06	2.11908e-07	5.61052e-09	9.75367e-11
8	0	1.38247	5.35356	11.0312	16.5237	19.4661	18.394	13.9066	8.30632	3.84954	1.35533	0.354254	0.0670925	0.00897876	0.000827514	5.1168e-05	2.06727e-06	5.31345e-08	8.45788e-10	8.11548e-12	4.56822e-14
9	0	1.79235	6.87402	13.7974	19.6378	21.2658	17.7216	11.2431	5.31767	1.82635	0.442281	0.0731918	0.00801192	0.000561066	2.42957e-05	6.28543e-07	9.38299e-09	7.80468e-11	3.49224e-13	8.11433e-16	9.4496e-19
10	0	2.38088	9.00485	17.4039	23.013	22.0728	15.348	7.56316	2.55577	0.570021	0.080511	0.0068965	0.000342678	9.43926e-06	1.37669e-07	1.01495e-09	3.60985e-12	5.91015e-15	4.24926e-18	1.27971e-21	1.53966e-25
11	0	3.25625	12.0619	22.0316	26.0967	20.8777	11.0751	3.74084	0.764738	0.0894567	0.00564369	0.000180646	2.75636e-06	1.8821e-08	5.39579e-11	6.09096e-14	2.53813e-17	3.65945e-21	1.71073e-25	2.42965e-30	9.82159e-36
12	0	4.61483	16.5468	27.6672	27.591	16.6207	5.77431	1.08041	0.100639	0.00429082	7.67521e-05	5.26937e-07	1.26868e-09	9.77941e-13	2.20202e-16	1.32092e-20	1.92457e-25	6.208e-31	4.04019e-37	4.83387e-44	9.68704e-52
			return rate per year
		2027	2028	2029	2030	2031	2032	2033	2034	2035	2036	2037	2038	2039	2040	2041	2042	2043	2044	2045	2046	2047	2048	2049	2050
year of disposal	AGE of disposal
	1	0.389198	1.54413	3.39816	5.786	8.41976	10.9035	12.7977	13.7249	13.4864	12.1377	9.98294	7.4772	5.07804	3.11163	1.71115	0.839713	0.365549	0.140308	0.0471877	0.0138172
	2	0.934891	3.70383	8.11922	13.7198	19.7165	25.0599	28.6559	29.6837	27.8963	23.7474	18.2479	12.5974	7.76967	4.25502	2.0555	0.869852	0.320172	0.101753	0.027713	0.00641943
2027	3	1.36715	5.40664	11.7943	19.7417	27.9298	34.6798	38.3848	38.0742	33.8437	26.875	18.9696	11.8273	6.46764	3.07815	1.2647	0.444807	0.13276	0.0333288	0.00697447	0.00120553
	4	1.50975	5.95701	12.915	21.3593	29.6255	35.714	37.9321	35.6155	29.5038	21.4547	13.6001	7.45371	3.50007	1.39464	0.466826	0.129909	0.0297366	0.00553877	0.000830313	9.90747e-05
	5	1.45741	5.73372	12.3328	20.0839	27.1564	31.5178	31.7476	27.7792	21.0202	13.6513	7.53728	3.50029	1.35152	0.428636	0.110265	0.0227128	0.00369724	0.000469321	4.58352e-05	3.39752e-06
	6	1.29902	5.09111	10.8377	17.2969	22.6231	24.9858	23.4846	18.7407	12.5989	7.05858	3.25388	1.21706	0.363919	0.0856608	0.0156228	0.00217226	0.000226523	1.74243e-05	9.72222e-07	3.86923e-08
	7	2.80523	10.9385	22.9664	35.6828	44.6491	46.1602	39.566	27.9285	16.0394	7.38142	2.67596	0.750303	0.159617	0.0252591	0.00291391	0.00024007	1.38352e-05	5.46155e-07	1.44601e-08	2.51383e-10
	8	3.73512	14.4641	29.8038	44.6432	52.593	49.6962	37.5723	22.4418	10.4006	3.66179	0.957111	0.181268	0.0242585	0.00223575	0.000138244	5.58529e-06	1.43557e-07	2.28512e-09	2.19261e-11	1.23423e-13
	9	1.68821	6.47463	12.9957	18.4968	20.0302	16.692	10.5898	5.00871	1.72024	0.416584	0.0689393	0.00754642	0.000528467	2.28841e-05	5.92024e-07	8.83782e-09	7.35122e-11	3.28934e-13	7.64288e-16	8.90056e-19
	10	0.950908	3.59648	6.95101	9.19124	8.81573	6.12992	3.02068	1.02076	0.227663	0.0321556	0.00275442	0.000136864	3.76999e-06	5.4984e-08	4.05363e-10	1.44175e-12	2.36048e-15	1.69713e-18	5.11109e-22	6.14931e-26
	11	0	2.37234	4.33319	5.1327	4.10624	2.17825	0.73575	0.150409	0.0175944	0.00111	3.55296e-05	5.42122e-07	3.70173e-09	1.06125e-11	1.19797e-14	4.99201e-18	7.19741e-22	3.36467e-26	4.77865e-31	1.93171e-36
	12	0	2.57991	4.31375	4.30186	2.59143	0.900304	0.168453	0.0156912	0.000669006	1.19668e-05	8.21577e-08	1.97807e-10	1.52476e-13	3.43329e-17	2.05952e-21	3.00071e-26	9.67924e-32	6.29928e-38	7.53675e-45	1.51036e-52
	1		0.441729	1.75255	3.85681	6.56695	9.5562	12.3752	14.525	15.5774	15.3066	13.776	11.3304	8.48642	5.76344	3.53162	1.94211	0.95305	0.414888	0.159246	0.0535567	0.0156821
	2		1.21653	4.81961	10.5651	17.853	25.6561	32.6092	37.2885	38.6259	36.3001	30.9014	23.745	16.3924	10.1103	5.53685	2.67471	1.1319	0.416624	0.132406	0.0360615	0.00835329
2028	3		2.0848	8.24468	17.9854	30.1045	42.5907	52.8839	58.5337	58.06	51.609	40.9822	28.9271	18.0357	9.86262	4.69393	1.92857	0.678295	0.202448	0.0508236	0.0106355	0.00183833
	4		2.40951	9.50718	20.6119	34.0887	47.2812	56.9983	60.5383	56.8412	47.0871	34.241	21.7054	11.8959	5.58599	2.2258	0.745039	0.20733	0.0474585	0.00883969	0.00132515	0.00015812
	5		2.38691	9.39052	20.1982	32.8928	44.476	51.6189	51.9953	45.4959	34.4262	22.3577	12.3443	5.73268	2.21348	0.702007	0.180589	0.0371984	0.00605523	0.000768641	7.50675e-05	5.56436e-06
	6		2.13604	8.37156	17.821	28.4421	37.2002	41.0853	38.6169	30.8162	20.717	11.6068	5.35052	2.00127	0.59841	0.140856	0.0256893	0.00357195	0.000372483	2.86516e-05	1.59867e-06	6.36236e-08
	7		1.77848	6.93487	14.5604	22.6224	28.307	29.2649	25.0843	17.7063	10.1687	4.67973	1.69652	0.475682	0.101195	0.016014	0.00184738	0.000152201	8.77131e-06	3.46255e-07	9.16751e-09	1.59374e-10
	8		3.66519	14.1933	29.2457	43.8074	51.6083	48.7658	36.8688	22.0216	10.2058	3.59322	0.93919	0.177874	0.0238043	0.00219389	0.000135656	5.48071e-06	1.40869e-07	2.24234e-09	2.15156e-11	1.21112e-13
	9		3.87189	14.8495	29.8056	42.4221	45.939	38.2828	24.2876	11.4874	3.94534	0.95543	0.158111	0.0173076	0.00121203	5.24845e-05	1.3578e-06	2.02694e-08	1.68599e-10	7.54406e-13	1.75288e-15	2.04133e-18
	10		1.87764	7.10152	13.7253	18.1488	17.4073	12.104	5.96455	2.01556	0.449537	0.0634936	0.00543881	0.000270247	7.44411e-06	1.0857e-07	8.00419e-10	2.84685e-12	4.66094e-15	3.3511e-18	1.00922e-21	1.21422e-25
	11		0.988886	3.66307	6.69075	7.92526	6.34033	3.36338	1.13605	0.232242	0.027167	0.00171393	5.48602e-05	8.37075e-07	5.71574e-09	1.63864e-11	1.84975e-14	7.70802e-18	1.11133e-21	5.1953e-26	7.37857e-31	2.9827e-36
	12		0.617814	2.21522	3.70397	3.69376	2.22511	0.77304	0.144641	0.0134731	0.000574437	1.02752e-05	7.05441e-08	1.69846e-10	1.30923e-13	2.94797e-17	1.76839e-21	2.57654e-26	8.31101e-32	5.40883e-38	6.47137e-45	1.29686e-52
				0.496095	1.96825	4.33149	7.37519	10.7323	13.8983	16.3127	17.4946	17.1905	15.4715	12.7248	9.53089	6.47278	3.96627	2.18114	1.07035	0.465951	0.178845	0.0601482	0.0176122
				1.38127	5.47227	11.9958	20.2706	29.1304	37.0251	42.338	43.8565	41.2158	35.0859	26.9605	18.6122	11.4794	6.28664	3.03692	1.28517	0.473043	0.150336	0.0409449	0.00948447
				2.71522	10.7378	23.424	39.2079	55.4697	68.8756	76.2338	75.6169	67.2151	53.3749	37.6745	23.4896	12.845	6.11333	2.51175	0.883405	0.263666	0.0661923	0.0138516	0.00239422
				3.67989	14.5197	31.4791	52.0614	72.2094	87.0497	92.4561	86.8097	71.9129	52.2939	33.1491	18.1678	8.5311	3.39932	1.13785	0.316641	0.0724802	0.0135003	0.00202381	0.000241486
				3.81825	15.0217	32.3103	52.6174	71.1466	82.5729	83.1749	72.7782	55.0704	35.7647	19.7468	9.17036	3.54082	1.12297	0.288882	0.0595049	0.00968632	0.00122957	0.000120083	8.9011e-06
2029				3.50983	13.7557	29.2825	46.7345	61.1253	67.5092	63.4532	50.6355	34.041	19.0716	8.79168	3.28838	0.983275	0.231447	0.0422113	0.00586923	0.000612044	4.70787e-05	2.62685e-06	1.04543e-07
				2.93738	11.4538	24.0484	37.3638	46.7526	48.3348	41.4299	29.2442	16.795	7.72916	2.80202	0.78565	0.167137	0.0264491	0.00305118	0.000251379	1.44869e-05	5.71885e-07	1.51413e-08	2.63226e-10
				2.33708	9.0502	18.6483	27.9334	32.9075	31.0951	23.5091	14.0419	6.50765	2.29119	0.598866	0.11342	0.0151786	0.00139891	8.64997e-05	3.49473e-06	8.9824e-08	1.42981e-09	1.37192e-11	7.72258e-14
				3.82718	14.678	29.4613	41.9322	45.4085	37.8407	24.0071	11.3548	3.89978	0.944396	0.156285	0.0171077	0.00119804	5.18783e-05	1.34212e-06	2.00354e-08	1.66652e-10	7.45694e-13	1.73264e-15	2.01776e-18
				4.34549	16.4353	31.7649	42.0024	40.2864	28.0127	13.804	4.66469	1.04038	0.146946	0.0125872	0.000625444	1.72282e-05	2.51268e-07	1.85244e-09	6.58857e-12	1.0787e-14	7.75559e-18	2.33568e-21	2.81013e-25
				1.97435	7.31347	13.3584	15.8231	12.6587	6.71513	2.26817	0.463681	0.05424	0.00342193	0.000109531	1.67126e-06	1.14117e-08	3.27161e-11	3.69311e-14	1.53894e-17	2.21882e-21	1.03726e-25	1.47316e-30	5.9551e-36
				0.966774	3.46644	5.79609	5.78011	3.48193	1.20968	0.226339	0.0210831	0.000898898	1.6079e-05	1.1039e-07	2.6578e-10	2.04872e-13	4.61308e-17	2.76723e-21	4.03185e-26	1.30053e-31	8.46391e-38	1.01266e-44	2.02937e-52
					0.496095	1.96825	4.33149	7.37519	10.7323	13.8983	16.3127	17.4946	17.1905	15.4715	12.7248	9.53089	6.47278	3.96627	2.18114	1.07035	0.465951	0.178845	0.0601482	0.0176122
					1.38127	5.47227	11.9958	20.2706	29.1304	37.0251	42.338	43.8565	41.2158	35.0859	26.9605	18.6122	11.4794	6.28664	3.03692	1.28517	0.473043	0.150336	0.0409449	0.00948447
					2.71522	10.7378	23.424	39.2079	55.4697	68.8756	76.2338	75.6169	67.2151	53.3749	37.6745	23.4896	12.845	6.11333	2.51175	0.883405	0.263666	0.0661923	0.0138516	0.00239422
					3.67989	14.5197	31.4791	52.0614	72.2094	87.0497	92.4561	86.8097	71.9129	52.2939	33.1491	18.1678	8.5311	3.39932	1.13785	0.316641	0.0724802	0.0135003	0.00202381	0.000241486
					3.81825	15.0217	32.3103	52.6174	71.1466	82.5729	83.1749	72.7782	55.0704	35.7647	19.7468	9.17036	3.54082	1.12297	0.288882	0.0595049	0.00968632	0.00122957	0.000120083	8.9011e-06
					3.50983	13.7557	29.2825	46.7345	61.1253	67.5092	63.4532	50.6355	34.041	19.0716	8.79168	3.28838	0.983275	0.231447	0.0422113	0.00586923	0.000612044	4.70787e-05	2.62685e-06	1.04543e-07
					2.93738	11.4538	24.0484	37.3638	46.7526	48.3348	41.4299	29.2442	16.795	7.72916	2.80202	0.78565	0.167137	0.0264491	0.00305118	0.000251379	1.44869e-05	5.71885e-07	1.51413e-08	2.63226e-10
					2.33708	9.0502	18.6483	27.9334	32.9075	31.0951	23.5091	14.0419	6.50765	2.29119	0.598866	0.11342	0.0151786	0.00139891	8.64997e-05	3.49473e-06	8.9824e-08	1.42981e-09	1.37192e-11	7.72258e-14
					3.82718	14.678	29.4613	41.9322	45.4085	37.8407	24.0071	11.3548	3.89978	0.944396	0.156285	0.0171077	0.00119804	5.18783e-05	1.34212e-06	2.00354e-08	1.66652e-10	7.45694e-13	1.73264e-15	2.01776e-18
					4.34549	16.4353	31.7649	42.0024	40.2864	28.0127	13.804	4.66469	1.04038	0.146946	0.0125872	0.000625444	1.72282e-05	2.51268e-07	1.85244e-09	6.58857e-12	1.0787e-14	7.75559e-18	2.33568e-21	2.81013e-25
					1.97435	7.31347	13.3584	15.8231	12.6587	6.71513	2.26817	0.463681	0.05424	0.00342193	0.000109531	1.67126e-06	1.14117e-08	3.27161e-11	3.69311e-14	1.53894e-17	2.21882e-21	1.03726e-25	1.47316e-30	5.9551e-36
					0.966774	3.46644	5.79609	5.78011	3.48193	1.20968	0.226339	0.0210831	0.000898898	1.6079e-05	1.1039e-07	2.6578e-10	2.04872e-13	4.61308e-17	2.76723e-21	4.03185e-26	1.30053e-31	8.46391e-38	1.01266e-44	2.02937e-52
						0.455183	1.80593	3.97428	6.76697	9.84726	12.7521	14.9674	16.0518	15.7729	14.1956	11.6755	8.7449	5.93898	3.63918	2.00126	0.982079	0.427525	0.164096	0.055188	0.0161598
						1.55185	6.14808	13.4773	22.7739	32.7279	41.5976	47.5666	49.2727	46.3058	39.419	30.2901	20.9107	12.8971	7.06302	3.41197	1.44389	0.531462	0.168902	0.0460015	0.0106558
						3.0855	12.2021	26.6183	44.5546	63.034	78.2681	86.6297	85.9286	76.3811	60.6535	42.8121	26.6928	14.5966	6.947	2.85427	1.00387	0.299622	0.0752188	0.0157405	0.00272072
2030						4.7996	18.9377	41.0576	67.9026	94.1812	113.537	120.588	113.224	93.7945	68.2058	43.2357	23.6958	11.1269	4.43366	1.48407	0.412988	0.0945344	0.0176081	0.00263962	0.000314965
						5.84425	22.9923	49.4545	80.5367	108.898	126.387	127.308	111.395	84.2912	54.7418	30.2246	14.0362	5.41961	1.71883	0.442165	0.0910787	0.014826	0.00188199	0.0001838	1.36241e-05
						5.63212	22.0734	46.9888	74.9934	98.0861	108.33	101.821	81.2534	54.6247	30.6036	14.1078	5.27677	1.57783	0.371397	0.0677352	0.00941819	0.000982129	7.55458e-05	4.21523e-06	1.67757e-07
						4.8469	18.8997	39.6817	61.6532	77.1453	79.7561	68.3626	48.2552	27.713	12.7537	4.62355	1.29638	0.275789	0.0436431	0.00503469	0.000414796	2.39046e-05	9.43654e-07	2.49843e-08	4.34343e-10
						3.88116	15.0296	30.9691	46.3887	54.6493	51.6393	39.0414	23.3192	10.8072	3.80496	0.994533	0.188356	0.025207	0.00232317	0.000143649	5.80366e-06	1.4917e-07	2.37447e-09	2.27834e-11	1.28248e-13
						2.45735	9.4244	18.9165	26.9237	29.1558	24.2967	15.4144	7.29063	2.50396	0.606375	0.100347	0.0109845	0.000769232	3.33099e-05	8.61745e-07	1.28643e-08	1.07004e-10	4.78793e-13	1.11249e-15	1.29556e-18
						4.33243	16.3859	31.6695	41.8762	40.1654	27.9285	13.7625	4.65068	1.03726	0.146504	0.0125494	0.000623565	1.71764e-05	2.50513e-07	1.84688e-09	6.56878e-12	1.07546e-14	7.73229e-18	2.32866e-21	2.80169e-25
						4.61763	17.1048	31.2426	37.0072	29.6063	15.7054	5.30481	1.08446	0.126857	0.00800322	0.000256171	3.90874e-06	2.66898e-08	7.65166e-11	8.63747e-14	3.59928e-17	5.18939e-21	2.42596e-25	3.44544e-30	1.39278e-35
						1.95484	7.00924	11.7198	11.6875	7.04054	2.446	0.457664	0.0426306	0.00181759	3.25122e-05	2.23211e-07	5.37414e-10	4.14256e-13	9.32777e-17	5.59541e-21	8.1525e-26	2.62971e-31	1.71142e-37	2.04763e-44	4.10343e-52
							0.50655	2.00972	4.42277	7.53061	10.9585	14.1912	16.6564	17.8632	17.5528	15.7975	12.993	9.73174	6.60918	4.04986	2.2271	1.0929	0.47577	0.182614	0.0614158
							1.42703	5.65357	12.3933	20.9422	30.0955	38.2518	43.7408	45.3096	42.5814	36.2484	27.8538	19.2288	11.8597	6.49493	3.13754	1.32775	0.488715	0.155317	0.0423015
							3.46932	13.72	29.9296	50.0971	70.8752	88.0043	97.4061	96.6179	85.8826	68.1986	48.1377	30.0133	16.4124	7.81118	3.20933	1.12875	0.336894	0.0845758	0.0176986
							5.46166	21.55	46.7211	77.2691	107.173	129.198	137.223	128.842	106.733	77.6142	49.1997	26.9644	12.6618	5.04524	1.68878	0.469956	0.107575	0.020037	0.00300373
							7.63862	30.0517	64.6386	105.264	142.333	165.192	166.396	145.597	110.171	71.5493	39.5045	18.3458	7.0836	2.24657	0.577924	0.119043	0.019378	0.00245981	0.000240232
2031							8.64632	33.8866	72.1362	115.128	150.58	166.306	156.314	124.739	83.8587	46.9821	21.658	8.10079	2.42226	0.570161	0.103986	0.0144586	0.00150775	0.000115976	6.47114e-06
							7.80897	30.4498	63.9322	99.331	124.291	128.497	110.141	77.7452	44.6491	20.5478	7.44912	2.08864	0.44433	0.0703145	0.00811151	0.000668288	3.85132e-05	1.52035e-06	4.02529e-08
							6.43771	24.9297	51.3686	76.9453	90.6472	85.6545	64.7582	38.6797	17.926	6.31131	1.64964	0.312427	0.041811	0.00385345	0.000238272	9.62658e-06	2.47429e-07	3.93855e-09	3.77911e-11
							4.10793	15.7547	31.6226	45.0082	48.7396	40.6166	25.7682	12.1877	4.18586	1.01367	0.16775	0.0183627	0.00128592	5.5684e-05	1.44057e-06	2.15051e-08	1.78877e-10	8.00396e-13	1.85974e-15
							2.80464	10.6076	20.5015	27.1089	26.0014	18.0798	8.9093	3.01066	0.671477	0.0948409	0.00812399	0.00040367	1.11193e-05	1.62172e-07	1.19559e-09	4.25236e-12	6.96208e-15	5.00556e-18	1.50748e-21
							4.65003	17.2248	31.4618	37.2668	29.8141	15.8156	5.34204	1.09207	0.127747	0.00805937	0.000257969	3.93617e-06	2.6877e-08	7.70535e-11	8.69808e-14	3.62453e-17	5.2258e-21	2.44298e-25	3.46962e-30
							4.62743	16.592	27.7428	27.6663	16.6661	5.79008	1.08337	0.100914	0.00430254	7.69617e-05	5.28376e-07	1.27215e-09	9.80612e-13	2.20804e-16	1.32453e-20	1.92983e-25	6.22496e-31	4.05122e-37	4.84707e-44
								0.505589	2.00591	4.41438	7.51632	10.9377	14.1643	16.6248	17.8294	17.5195	15.7675	12.9684	9.71328	6.59664	4.04217	2.22287	1.09083	0.474867	0.182268
								1.58807	6.29157	13.7918	23.3054	33.4917	42.5684	48.6768	50.4227	47.3866	40.339	30.997	21.3988	13.1981	7.22787	3.4916	1.47759	0.543866	0.172844
								3.20539	12.6762	27.6526	46.2859	65.4833	81.3093	89.9959	89.2676	79.349	63.0103	44.4756	27.73	15.1638	7.21694	2.96518	1.04288	0.311265	0.0781416
								6.1492	24.2628	52.6026	86.9961	120.664	145.463	154.497	145.061	120.169	87.3847	55.3931	30.3588	14.2557	5.68036	1.90138	0.529116	0.121117	0.0225593
								8.70982	34.266	73.7032	120.026	162.293	188.357	189.731	166.015	125.621	81.5831	45.0444	20.9185	8.07697	2.56162	0.65897	0.135737	0.0220955	0.00280477
								11.3332	44.4171	94.5531	150.906	197.374	217.987	204.89	163.502	109.919	61.5822	28.3883	10.6182	3.17499	0.747343	0.1363	0.0189518	0.00197629	0.000152017
2032								12.0342	46.9253	98.5241	153.076	191.541	198.023	169.735	119.811	68.8075	31.6657	11.4796	3.21874	0.684745	0.10836	0.0125004	0.00102988	5.93517e-05	2.34296e-06
								10.4237	40.3652	83.174	124.587	146.772	138.688	104.854	62.6287	29.0251	10.219	2.67103	0.50587	0.0676988	0.00623935	0.000385801	1.5587e-05	4.00628e-07	6.37714e-09
								6.85687	26.2974	52.7837	75.1268	81.355	67.7963	43.0118	20.3435	6.98694	1.692	0.280005	0.0306507	0.00214643	9.29465e-05	2.40457e-06	3.58958e-08	2.98578e-10	1.336e-12
								4.72522	17.8715	34.5407	45.6728	43.8068	30.4606	15.0103	5.07231	1.1313	0.159787	0.0136872	0.000680099	1.87337e-05	2.73225e-07	2.01432e-09	7.16432e-12	1.17296e-14	8.43331e-18
								3.03902	11.2573	20.5619	24.3557	19.485	10.3363	3.49129	0.713722	0.083489	0.0052672	0.000168595	2.57248e-06	1.75655e-08	5.03583e-11	5.68462e-14	2.36881e-17	3.41532e-21	1.59661e-25
								4.71362	16.9011	28.2595	28.1816	16.9765	5.89793	1.10354	0.102793	0.00438268	7.83952e-05	5.38218e-07	1.29584e-09	9.98877e-13	2.24916e-16	1.3492e-20	1.96577e-25	6.3409e-31	4.12668e-37
									0.504601	2.00199	4.40576	7.50164	10.9164	14.1366	16.5924	17.7945	17.4853	15.7368	12.943	9.69431	6.58376	4.03428	2.21853	1.0887	0.47394
									1.58505	6.27963	13.7657	23.2612	33.4282	42.4876	48.5844	50.327	47.2967	40.2624	30.9382	21.3582	13.173	7.21415	3.48498	1.47479	0.542834
									3.56711	14.1067	30.7732	51.5091	72.873	90.4849	100.152	99.3412	88.3034	70.1209	49.4946	30.8593	16.875	8.03135	3.2998	1.16057	0.34639
									5.72593	22.5927	48.9818	81.0079	112.358	135.45	143.862	135.077	111.897	81.3698	51.5803	28.2692	13.2745	5.28936	1.7705	0.492695	0.11278
									9.82516	38.6539	83.1412	135.396	183.075	212.477	214.026	187.273	141.708	92.0301	50.8126	23.5972	9.11126	2.88965	0.743354	0.153118	0.0249249
									12.9578	50.784	108.107	172.537	225.666	249.234	234.26	186.939	125.674	70.4095	32.4576	12.1402	3.6301	0.854469	0.155838	0.0216683	0.00225958
2033									15.8317	61.7331	129.615	201.381	251.984	260.512	223.297	157.619	90.5205	41.6582	15.1022	4.23445	0.900824	0.142554	0.0164451	0.00135487	7.80808e-05
									16.1401	62.5016	128.787	192.911	227.263	214.746	162.356	96.9745	44.9425	15.8232	4.13583	0.783291	0.104825	0.00966104	0.000597376	2.41349e-05	6.20334e-07
									11.1692	42.836	85.9796	122.374	132.52	110.434	70.0621	33.1376	11.3811	2.75611	0.456102	0.049927	0.00349633	0.000151401	3.91682e-06	5.84709e-08	4.86356e-10
									7.94609	30.0534	58.0848	76.8049	73.6671	51.2235	25.2418	8.52978	1.90242	0.268703	0.0230168	0.00114368	3.15032e-05	4.59464e-07	3.38734e-09	1.20478e-11	1.97249e-14
									5.16673	19.1388	34.9578	41.4079	33.127	17.573	5.93563	1.21342	0.141942	0.00895491	0.000286634	4.37355e-06	2.98636e-08	8.56155e-11	9.66459e-14	4.02728e-17	5.80649e-21
									3.11438	11.1668	18.6716	18.6201	11.2167	3.89687	0.729132	0.0679174	0.00289572	5.17971e-05	3.5561e-07	8.56186e-10	6.59976e-13	1.48606e-16	8.91438e-21	1.29882e-25	4.18955e-31
										0.503588	1.99797	4.39691	7.48658	10.8944	14.1082	16.559	17.7588	17.4502	15.7052	12.917	9.67484	6.57054	4.02618	2.21408	1.08651
										1.58196	6.26737	13.7388	23.2158	33.3629	42.4047	48.4896	50.2287	47.2043	40.1838	30.8778	21.3164	13.1473	7.20007	3.47817	1.47191
										3.56034	14.08	30.7148	51.4114	72.7347	90.3132	99.9617	99.1527	88.1358	69.9879	49.4007	30.8007	16.843	8.01611	3.29353	1.15837
										6.37209	25.1423	54.5093	90.1495	125.038	150.735	160.097	150.32	124.524	90.5522	57.401	31.4593	14.7724	5.88626	1.9703	0.548295
										9.25352	36.405	78.304	127.518	172.423	200.115	201.574	176.378	133.463	86.6757	47.8562	22.2243	8.58116	2.72152	0.700104	0.14421
										14.6551	57.4363	122.268	195.138	255.226	281.882	264.946	211.426	142.137	79.6326	36.7093	13.7305	4.10562	0.966398	0.176251	0.0245067
										18.1644	70.8291	148.712	231.054	289.112	298.897	256.198	180.843	103.858	47.7963	17.3274	4.85837	1.03356	0.163558	0.0188682	0.0015545
										21.3297	82.5982	170.197	254.939	300.336	283.794	214.56	128.155	59.3932	20.9109	5.46566	1.03515	0.13853	0.0127674	0.000789454	3.18952e-05
										17.3937	66.7084	133.896	190.573	206.372	171.978	109.107	51.605	17.7237	4.29209	0.710285	0.0777512	0.00544483	0.000235776	6.09966e-06	9.10566e-08
										13.0355	49.3024	95.2879	125.998	120.85	84.032	41.409	13.9931	3.12092	0.440805	0.037759	0.0018762	5.16809e-05	7.53748e-07	5.55692e-09	1.97643e-11
										8.76393	32.4637	59.2963	70.237	56.1907	29.8077	10.0682	2.05823	0.240765	0.0151895	0.000486195	7.41852e-06	5.06553e-08	1.45223e-10	1.63933e-13	6.83118e-17
										5.35013	19.1833	32.0756	31.9872	19.269	6.69436	1.25256	0.116674	0.00497451	8.89814e-05	6.10897e-07	1.47083e-09	1.13376e-12	2.55288e-16	1.53139e-20	2.23123e-25
											0.502548	1.99385	4.38783	7.47112	10.8719	14.0791	16.5248	17.7221	17.4141	15.6727	12.8904	9.65486	6.55697	4.01787	2.20951
											1.57878	6.25478	13.7112	23.1692	33.2959	42.3195	48.3922	50.1278	47.1095	40.1031	30.8158	21.2736	13.1209	7.1856	3.47118
											3.55339	14.0525	30.6548	51.311	72.5927	90.1368	99.7664	98.9591	87.9637	69.8512	49.3042	30.7406	16.8101	8.00046	3.2871
											6.36	25.0946	54.4059	89.9785	124.801	150.449	159.793	150.034	124.288	90.3803	57.2921	31.3996	14.7444	5.87509	1.96656
											10.2978	40.5132	87.1404	141.908	191.881	222.698	224.321	196.281	148.524	96.4569	53.2567	24.7323	9.54952	3.02864	0.77911
											14.0161	54.9319	116.936	186.629	244.098	269.591	253.394	202.208	135.939	76.1604	35.1087	13.1318	3.9266	0.92426	0.168566
											20.6126	80.3752	168.755	262.194	328.078	339.181	290.727	205.216	117.856	54.2381	19.6627	5.51316	1.17285	0.185602	0.0214112
											24.5787	95.1798	196.122	293.772	346.085	327.023	247.242	147.676	68.4402	24.0961	6.2982	1.19282	0.159632	0.0147122	0.000909706
											23.1125	88.641	177.918	253.23	274.224	228.522	144.98	68.5718	23.5509	5.70325	0.943815	0.103314	0.00723499	0.000313296	8.10512e-06
											20.438	77.2996	149.399	197.548	189.478	131.751	64.9239	21.9393	4.89319	0.691125	0.0592011	0.00294163	8.10288e-05	1.18178e-06	8.71252e-09
											14.4961	53.697	98.0799	116.177	92.9431	49.3039	16.6534	3.40444	0.398242	0.0251245	0.000804198	1.22707e-05	8.37871e-08	2.40208e-10	2.71156e-13
											9.16532	32.863	54.9488	54.7973	33.0097	11.4681	2.14577	0.199875	0.00852183	0.000152434	1.04653e-06	2.51968e-09	1.94225e-12	4.37334e-16	2.62342e-20
												0.501482	1.98962	4.37853	7.45528	10.8489	14.0492	16.4898	17.6845	17.3772	15.6395	12.863	9.63439	6.54306	4.00934
												1.57552	6.24187	13.6829	23.1213	33.2271	42.2321	48.2923	50.0243	47.0122	40.0203	30.7522	21.2297	13.0938	7.17077
												3.54625	14.0242	30.5932	51.2079	72.4469	89.9558	99.5661	98.7603	87.787	69.7109	49.2052	30.6788	16.7764	7.98439
												6.34758	25.0455	54.2996	89.8027	124.557	150.155	159.481	149.741	124.045	90.2038	57.1802	31.3383	14.7156	5.86362
												10.2782	40.4363	86.9751	141.639	191.517	222.275	223.896	195.909	148.242	96.2739	53.1557	24.6854	9.5314	3.0229
												15.5978	61.1309	130.133	207.69	271.643	300.013	281.988	225.026	151.28	84.755	39.0706	14.6137	4.36971	1.02856
												20.1066	78.4022	164.613	255.758	320.025	330.855	283.591	200.179	114.963	52.9067	19.18	5.37783	1.14406	0.181046
												28.0071	108.456	223.477	334.748	394.358	372.637	281.728	168.275	77.9865	27.4571	7.1767	1.3592	0.181898	0.0167643
												26.7726	102.678	206.093	293.332	317.65	264.71	167.939	79.4308	27.2804	6.60641	1.09328	0.119675	0.00838071	0.000362909
												27.3336	103.38	199.805	264.2	253.406	176.203	86.8288	29.3414	6.54412	0.924306	0.0791753	0.00393412	0.000108367	1.5805e-06
												22.9074	84.8542	154.99	183.587	146.873	77.912	26.3164	5.37984	0.629318	0.0397027	0.00127083	1.93907e-05	1.32404e-07	3.79587e-10
												15.3039	54.8731	91.7511	91.4981	55.1182	19.149	3.58291	0.333742	0.0142294	0.000254528	1.74745e-06	4.20725e-09	3.24308e-12	7.30242e-16
													0.589056	2.33707	5.14315	8.75719	12.7434	16.5026	19.3694	20.7728	20.4118	18.3706	15.1093	11.3168	7.68568
													1.57218	6.22863	13.6539	23.0723	33.1567	42.1426	48.1898	49.9182	46.9125	39.9354	30.6869	21.1847	13.066
													3.53893	13.9953	30.5301	51.1022	72.2973	89.7701	99.3605	98.5564	87.6058	69.567	49.1036	30.6155	16.7417
													6.33483	24.9952	54.1905	89.6224	124.307	149.854	159.161	149.441	123.796	90.0227	57.0654	31.2753	14.6861
													10.2581	40.3574	86.8052	141.362	191.143	221.841	223.458	195.526	147.953	96.0858	53.0519	24.6372	9.51279
													15.5682	61.0149	129.886	207.296	271.128	299.444	281.453	224.599	150.993	84.5941	38.9965	14.586	4.36142
													22.3756	87.2497	183.189	284.62	356.139	368.191	315.594	222.769	127.936	58.8771	21.3445	5.98471	1.27317
													27.9957	108.412	223.387	334.613	394.198	372.486	281.614	168.207	77.9549	27.446	7.17379	1.35865	0.181824
													30.6596	117.586	236.015	335.92	363.769	303.143	192.322	90.9631	31.2412	7.56558	1.25201	0.137051	0.00959749
													31.8582	120.493	232.879	307.933	295.352	205.37	101.202	34.1983	7.62737	1.07731	0.0922811	0.00458533	0.000126305
													30.867	114.338	208.844	247.378	197.906	104.984	35.4605	7.24918	0.847987	0.0534983	0.0017124	2.61284e-05	1.7841e-07
													24.4027	87.4976	146.301	145.898	87.8884	30.5338	5.7131	0.532166	0.0226894	0.000405856	2.78638e-06	6.70864e-09	5.17124e-12
														0.677352	2.68738	5.91408	10.0698	14.6536	18.9763	22.2728	23.8865	23.4714	21.1243	17.3741	13.0132
														1.84673	7.31633	16.0382	27.1014	38.9468	49.5019	56.6052	58.6355	55.1048	46.9093	36.0458	24.8842
														3.53142	13.9656	30.4653	50.9938	72.144	89.5797	99.1498	98.3474	87.42	69.4194	48.9994	30.5506
														6.32175	24.9436	54.0787	89.4373	124.05	149.544	158.832	149.132	123.541	89.8368	56.9476	31.2108
														10.2375	40.2763	86.6309	141.079	190.759	221.395	223.01	195.134	147.655	95.8929	52.9453	24.5877
														15.5378	60.8957	129.632	206.891	270.599	298.859	280.904	224.161	150.698	84.4289	38.9203	14.5575
														22.3331	87.0842	182.842	284.08	355.463	367.493	314.995	222.346	127.693	58.7654	21.304	5.97335
														31.155	120.646	248.596	372.373	438.682	414.52	313.394	187.188	86.7519	30.5432	7.98334	1.51197
														31.5645	121.056	242.982	345.835	374.505	312.09	197.998	93.648	32.1633	7.78888	1.28896	0.141096
														36.6995	138.803	268.268	354.728	340.235	236.579	116.581	39.3952	8.78645	1.24102	0.106305	0.00528214
														36.2353	134.224	245.166	290.401	232.326	123.243	41.6277	8.50993	0.995466	0.0628025	0.00201022	3.06725e-05
														33.1659	118.919	198.839	198.291	119.45	41.4989	7.76474	0.723273	0.0308374	0.000551603	3.787e-06	9.11779e-09
															0.766371	3.04056	6.69131	11.3932	16.5794	21.4702	25.1999	27.0257	26.556	23.9004	19.6574
															2.12354	8.41301	18.4423	31.1638	44.7847	56.922	65.09	67.4246	63.3647	53.9408	41.4489
															4.14812	16.4044	35.7855	59.8989	84.7425	105.223	116.464	115.522	102.686	81.5421	57.5562
															6.30835	24.8907	53.964	89.2477	123.787	149.227	158.495	148.816	123.279	89.6463	56.8268
															10.2164	40.1931	86.452	140.787	190.365	220.938	222.549	194.731	147.351	95.6949	52.836
															15.5066	60.7734	129.372	206.475	270.055	298.259	280.34	223.711	150.395	84.2594	38.8421
															22.2895	86.9141	182.485	283.525	354.769	366.775	314.38	221.912	127.444	58.6506	21.2624
															31.0958	120.417	248.124	371.666	437.85	413.734	312.799	186.833	86.5873	30.4853	7.96819
															35.1265	134.717	270.402	384.861	416.767	347.309	220.342	104.216	35.7929	8.66784	1.43442
															39.1224	147.967	285.98	378.148	362.698	252.198	124.277	41.9962	9.36655	1.32295	0.113323
															42.0289	155.685	284.365	336.833	269.472	142.948	48.2835	9.87057	1.15463	0.0728439	0.00233163
															39.2554	140.753	235.347	234.699	141.382	49.1183	9.19039	0.85607	0.0364993	0.000652881	4.48231e-06
																0.856112	3.3966	7.47486	12.7274	18.5208	23.9843	28.1507	30.1904	29.6657	26.6991
																2.40262	9.51865	20.866	35.2593	50.6704	64.4027	73.6442	76.2856	71.6922	61.0297
																4.76989	18.8633	41.1495	68.8774	97.4449	120.995	133.922	132.838	118.078	93.7648
																7.40997	29.2374	63.3877	104.833	145.404	175.287	186.173	174.804	144.807	105.301
																10.1947	40.1079	86.2687	140.489	189.962	220.47	222.077	194.318	147.038	95.4919
																15.4746	60.6479	129.105	206.049	269.498	297.643	279.761	223.249	150.085	84.0854
																22.2447	86.7396	182.118	282.956	354.056	366.038	313.748	221.466	127.188	58.5328
																31.0351	120.182	247.639	370.94	436.995	412.926	312.188	186.468	86.4182	30.4258
																35.0599	134.462	269.888	384.131	415.977	346.65	219.924	104.018	35.725	8.65139
																43.5373	164.665	318.252	420.821	403.628	280.658	138.302	46.7354	10.4235	1.47224
																46.6549	172.821	315.664	373.907	299.132	158.682	53.598	10.957	1.28172	0.0808617
																45.891	164.546	275.13	274.371	165.281	57.4212	10.7439	1.00078	0.042669	0.000763242
																	0.946575	3.75551	8.26471	14.0722	20.4778	26.5187	31.1254	33.3805	32.8004
																	2.68397	10.6333	23.3094	39.3882	56.6038	71.9442	82.2679	85.2185	80.0873
																	5.39676	21.3424	46.5574	77.9293	110.251	136.897	151.522	150.296	133.596
																	8.52068	33.6199	72.8891	120.547	167.199	201.561	214.08	201.006	166.513
																	11.975	47.1119	101.334	165.022	223.134	258.97	260.859	228.252	172.715
																	15.4418	60.5193	128.831	205.612	268.926	297.012	279.168	222.775	149.766
																	22.1988	86.5605	181.742	282.371	353.325	365.283	313.101	221.009	126.925
																	30.9728	119.941	247.142	370.195	436.117	412.096	311.561	186.094	86.2446
																	34.9914	134.199	269.361	383.381	415.164	345.973	219.494	103.815	35.6552
																	43.4547	164.352	317.648	420.022	402.862	280.126	138.039	46.6467	10.4038
																	51.9198	192.323	351.286	416.102	332.888	176.589	59.6464	12.1935	1.42636
																	53.3618	191.333	319.919	319.037	192.187	66.769	12.493	1.1637	0.0496153
																		1.05908	4.20187	9.24699	15.7448	22.9117	29.6705	34.8247	37.3479
																		2.96758	11.7569	25.7724	43.5502	62.585	79.5463	90.9609	94.2234
																		6.02871	23.8415	52.0092	87.0548	123.161	152.927	169.265	167.895
																		9.64048	38.0383	82.4683	136.389	189.173	228.051	242.214	227.422
																		13.77	54.1737	116.523	189.758	256.581	297.789	299.96	262.465
																		18.1384	71.0878	151.328	241.518	315.888	348.879	327.918	261.678
																		22.1517	86.3769	181.357	281.773	352.576	364.508	312.436	220.54
																		30.9088	119.693	246.632	369.431	435.217	411.246	310.918	185.71
																		34.9211	133.929	268.82	382.611	414.331	345.278	219.053	103.607
																		43.3698	164.032	317.028	419.202	402.076	279.579	137.77	46.5556
																		51.8213	191.958	350.62	415.313	332.257	176.253	59.5332	12.1703
																		59.3835	212.924	356.022	355.04	213.875	74.3037	13.9028	1.29502
																			1.1725	4.65187	10.2373	17.431	25.3654	32.8481	38.5543
																			3.32028	13.1542	28.8355	48.7263	70.0234	89.0007	101.772
																			6.66575	26.3608	57.5049	96.2536	136.176	169.086	187.151
																			10.7694	42.4925	92.1252	152.36	211.324	254.755	270.577
																			15.5797	61.2933	131.837	214.696	290.301	336.924	339.381
																			20.8572	81.7434	174.012	277.72	363.238	401.174	377.072
																			26.0201	101.461	213.027	330.978	414.146	428.162	366.997
																			30.8433	119.439	246.109	368.648	434.294	410.374	310.259
																			34.849	133.653	268.265	381.821	413.475	344.565	218.601
																			43.2827	163.702	316.391	418.36	401.268	279.017	137.493
																			51.7201	191.583	349.935	414.501	331.608	175.909	59.417
																			59.2708	212.52	355.346	354.366	213.469	74.1627	13.8764
																				1.28684	5.10552	11.2357	19.1308	27.8391	36.0514
																				3.67587	14.563	31.9237	53.9447	77.5226	98.5323
																				7.458	29.4939	64.3396	107.694	152.361	189.183
																				11.9073	46.9826	101.86	168.46	233.654	281.674
																				17.4041	68.4707	147.275	239.837	324.295	376.378
																				23.5983	92.4863	196.88	314.219	410.976	453.897
																				29.9203	116.669	244.958	380.59	476.225	492.341
																				36.2294	140.297	289.087	433.024	510.134	482.037
																				34.7751	133.369	267.696	381.011	412.598	343.834
																				43.1934	163.364	315.738	417.496	400.44	278.441
																				51.6162	191.199	349.232	413.669	330.942	175.556
																				59.1551	212.105	354.652	353.674	213.053	74.0179
																					1.40211	5.56282	12.242	20.8444	30.3326
																					4.03434	15.9832	35.0369	59.2054	85.0826
																					8.25672	32.6526	71.2301	119.227	168.678
																					13.3226	52.5666	113.966	188.482	261.425
																					19.2431	75.7058	162.837	265.18	358.563
																					26.3616	103.316	219.935	351.013	459.1
																					33.8525	132.002	277.151	430.608	538.811
																					41.66	161.326	332.419	497.932	586.6
																					40.8479	156.66	314.444	447.547	484.65
																					43.1018	163.018	315.068	416.611	399.59
																					51.5096	190.804	348.511	412.815	330.259
																					59.0363	211.679	353.94	352.964	212.625
																						1.51829	6.02377	13.2564	22.5716
																						4.3957	17.4148	38.1752	64.5084
																						9.06192	35.8369	78.1765	130.854
																						14.7494	58.1963	126.172	208.667
																						21.5302	84.7037	182.19	296.697
																						29.1472	114.233	243.175	388.104
																						37.8166	147.459	309.605	481.031
																						47.135	182.528	376.106	563.371
																						46.9708	180.142	361.578	514.632
																						50.6286	191.485	370.088	489.364
																						51.4004	190.399	347.772	411.939
																						58.9144	211.242	353.209	352.235
																							1.59854	6.34216	13.9571
																							4.75993	18.8578	41.3385
																							9.87359	39.0467	85.1787
																							16.1877	63.8716	138.476
																							23.836	93.7751	201.702
																							32.6114	127.81	272.077
																							41.8126	163.041	342.32
																							52.6545	203.902	420.147
																							53.1437	203.817	409.097
																							58.2176	220.188	425.562
																							60.3764	223.648	408.504
																							58.7895	210.794	352.46
																								1.67944	6.66313
																								5.01153	19.8545
																								10.6917	42.2822
																								17.6376	69.5926
																								26.1605	102.92
																								36.104	141.498
																								46.7821	182.419
																								58.2184	225.448
																								59.3668	227.683
																								65.8686	249.125
																								69.4265	257.172
																								69.0559	247.605
																									1.76098
																									5.26515
2050																									11.2569
																									19.0991
																									28.5037
																									39.6248
																									51.7923
																									65.1378
																									65.6399
																									73.5817
																									78.5506
																									79.4069
																									0
		2027	2028	2029	2030	2031	2032	2033	2034	2035	2036	2037	2038	2039	2040	2041	2042	2043	2044	2045	2046	2047	2048	2049	2050
	1	0.389198	1.98586	5.6468	12.1072	21.7416	34.4789	50.8525	70.8664	92.95	115.174	135.488	152.116	163.969	170.927	173.955	174.964	176.371	180.492	188.948	202.388	220.586	242.768	267.935	295.125
	2	0.934891	4.92035	14.3201	31.1385	56.5894	90.5575	133.002	182.556	235.07	285.833	330.354	365.136	388.598	401.706	407.861	412.138	419.984	435.871	462.447	500.417	549.078	607.027	672.571	743.881
	3	1.36715	7.49144	22.7542	51.1802	95.2817	155.574	232.434	323.267	420.414	514.881	597.904	662.644	705.699	728.612	738.101	744.062	756.555	783.18	828.156	892.9	977.028	1079.07	1196.84	1327.51
	4	1.50975	8.36652	26.1021	60.1708	114.513	190.935	290.519	410.029	539.969	669.027	785.603	880.464	949.289	993.894	1022.04	1044.92	1073.12	1114.71	1175.42	1259.71	1370.7	1509.25	1673.57	1859.97
	5	1.45741	8.12063	25.5415	59.122	113.226	191.552	297.97	432.912	588.886	753.5	912.108	1050.89	1161.75	1244.93	1306.66	1355.43	1399.81	1448.49	1511.76	1600.84	1724.94	1888.52	2090.47	2325.72
	6	1.29902	7.22715	22.7191	52.3834	99.7354	168.923	265.339	393.005	551.555	733.409	924.54	1109.71	1277.1	1421.25	1540.62	1633.83	1702.46	1756.31	1813.16	1893.89	2015.92	2189.02	2414.29	2685.89
	7	2.80523	12.717	32.8387	64.6344	107.621	162.588	233.502	329.882	463.058	637.914	847.602	1076.63	1307.49	1522.34	1704.81	1843.75	1937.4	1996.88	2044.61	2107.69	2211.72	2374.52	2602.35	2890.42
	8	3.73512	18.1293	46.3341	85.2763	127.98	169.353	209.935	263.508	355.236	504.796	717.445	980.568	1267.49	1544.92	1782	1962.37	2086.56	2164.44	2213.16	2259.38	2335.25	2470.03	2680.12	2965.06
	9	1.68821	10.3465	31.6724	66.8075	109.049	147.557	175.61	200.133	243.99	334.233	487.8	702.878	956.1	1211.83	1439.36	1622.47	1758.54	1851.18	1906.62	1939.77	1978.52	2055.97	2198.17	2413.64
	10	0.950908	5.47412	18.398	43.6973	79.4972	116.495	142.73	156.866	174.985	225.061	333.825	509.391	734.319	975.301	1202.99	1401.22	1561.89	1680.96	1757.82	1797.86	1820.19	1858.59	1948.49	2111.71
	11	0	3.36123	9.97061	21.1113	37.321	59.4549	85.762	111.197	132.269	158.379	215.925	329.547	497.83	697.609	902.354	1094.18	1263.92	1402.84	1501.53	1557.21	1579.3	1592.64	1633.6	1735.08
	12	0	3.19772	7.49575	12.439	17.5026	26.3383	38.5154	47.3967	52.674	66.3804	105.132	178.555	290.48	436.411	599.288	760.849	914.317	1055.42	1169.44	1241.07	1271.89	1278.95	1288.35	1333.57
	sum	16.1369	91.3378	263.793	560.068	980.057	1513.81	2156.68	2923.62	3855.47	5006.1	6404.66	8012.69	9716.74	11367.6	12837.6	14065.9	15063.9	15880.5	16579.7	17257.2	18057.3	19147.4	20667.2	22687.8
