# Supplementary material for: Exploring the state of health of electric vehicle batteries at end of use; hierarchical waste flow analysis to determine the recycling and reuse potential
Source: J Remanuf. 2024 Jan 26;14(1):155–68. doi: 10.1007/s13243-024-00137-4 (PMC10913409; doi:10.1007/s13243-024-00137-4)
Supplement: Supplementary file 2 — Supplementary file2 (XLSX 89 KB) [file 13243_2024_137_MOESM2_ESM.xlsx]

## Sheet: EOL_STOCK_by_year_of_register
	Year of disposal	2011	2012	2013	2014	2015	2016	2017	2018	2019	2020	2021	2022	2023	2024	2025	2026	2027	2028	2029	2030	2031	2032	2033	2034	2035	2036	2037	2038	2039	2040	2041	2042	2043	2044	2045	2046	2047	2048	2049	2050
Age of Market Internace
2010		0.21262	0.58823	1.03088	1.46818	1.83174	2.06578	2.13807	2.04683	1.8198	1.5055	1.15971	0.831708	0.554976	0.344222	0.198219	0.10583	0.0523116	0.0239031	0.0100808	0.223554	0.151053	0.098273	0.061529	0.037054	0.0214519
2011			0.521716	1.44465	2.53654	3.62383	4.54177	5.15356	5.3761	5.19717	4.67542	3.92212	3.07049	2.24324	1.52861	0.970723	0.573842	0.315388	0.160939	0.076141	0.0333484	0.571305	0.386023	0.251142	0.157241	0.0946937	0.0548215
2012				1.48198	4.10707	7.22414	10.3512	13.029	14.87	15.628	15.2478	13.8705	11.7897	9.37179	6.96777	4.84317	3.14483	1.90571	1.07647	0.566087	0.276765	0.125625	1.68908	1.14129	0.742507	0.464886	0.279964	0.162081
2013					0.481901	1.33657	2.35493	3.38371	4.27639	4.90744	5.19403	5.11207	4.6995	4.04445	3.26177	2.46555	1.74621	1.158	0.718366	0.41643	0.225308	0.113632	0.0533498	0.571305	0.386023	0.251142	0.157241	0.0946937	0.0548215
2014						2.17678	6.04192	10.6624	15.3608	19.4879	22.48	23.9518	23.7693	22.0697	19.2183	15.7125	12.0646	8.69776	5.88401	3.73204	2.21712	1.23231	0.64005	0.310264	2.68265	1.81263	1.17928	0.738348	0.444649	0.257423
2015							4.50087	12.5016	22.0953	31.9113	40.6328	47.1022	50.5039	50.5125	47.3453	41.6904	34.5296	26.9095	19.7291	13.601	8.8099	5.35676	3.05429	1.6312	0.815034	5.76273	3.8938	2.53326	1.58608	0.955171	0.552982
2016								3.5967	9.99686	17.6938	25.6151	32.7285	38.1166	41.1146	41.4277	39.1791	34.8661	29.2342	23.1056	17.2126	12.0805	7.98249	4.96173	2.89831	1.58933	0.817248	4.78158	3.23085	2.10195	1.31604	0.792545	0.458832
2017									5.2573	14.6217	25.9148	37.6009	48.2002	56.3842	61.1653	62.0663	59.1978	53.2121	45.1398	36.1564	27.3455	19.521	13.1452	8.34326	4.98672	2.80395	1.48164	7.25309	4.90082	3.18841	1.99627	1.2022	0.695995
2018										9.96394	27.7287	49.2085	71.5513	92.0065	108.081	117.88	120.418	115.782	105.071	90.1235	73.1092	56.0937	40.6945	27.8996	18.0628	11.0339	6.35364	3.44534	14.2578	9.6338	6.26763	3.92418	2.36322	1.36815
2019											22.1788	61.7571	109.731	159.878	206.192	243.185	266.595	274.07	265.545	243.17	210.781	173.061	134.609	99.1637	69.1552	45.6249	28.4538	16.7594	9.31425	32.8997	22.2299	14.4625	9.05501	5.45312	3.15701
2020												21.3079	59.3645	105.603	154.16	199.378	236.042	260.028	268.939	262.479	242.44	212.26	176.285	138.909	103.834	73.5969	49.4339	31.4426	18.9226	10.7653	32.7496	22.1285	14.3965	9.01371	5.42824	3.1426
2021													13.3159	37.1179	66.1022	96.6739	125.364	148.955	164.854	171.486	168.532	156.945	138.723	116.475	92.9212	70.4288	50.6964	34.6382	22.4486	13.7894	8.02146	21.1951	14.3212	9.31721	5.83353	3.51308	2.03385
2022														21.6936	60.5005	107.858	158.017	205.435	244.934	272.278	284.786	281.734	264.42	235.846	200.09	161.518	124.05	90.6169	62.9285	41.5179	26.0051	15.4516	35.7424	24.1507	15.7121	9.83741	5.9243	3.42979
2023															35.3316	98.5818	175.925	258.168	336.456	402.462	449.28	472.377	470.263	444.657	400.048	342.774	279.819	217.63	161.221	113.707	76.3069	48.692	29.5219	60.2285	40.6956	26.476	16.5767	9.98285	5.77943
2024																56.219	156.932	280.324	412.028	538.216	645.819	723.846	764.853	766.015	729.458	661.705	572.349	472.255	371.736	279.088	199.766	136.253	88.4986	54.7001	99.1082	66.9661	43.5673	27.2776	16.4272	9.51027
2025																	85.6139	239.09	427.471	629.262	823.798	991.448	1115.5	1184.3	1192.91	1143.69	1045.65	912.636	760.759	605.733	460.603	334.372	231.621	153.007	96.3267	156.015	105.417	68.5832	42.9401	25.8594	14.971
2026																		111.359	311.116	556.735	820.733	1076.73	1299.55	1467.51	1565.1	1585.12	1529.57	1408.99	1240.37	1044.09	840.469	646.929	475.998	334.636	224.657	143.938	209.68	141.678	92.1739	57.7103	34.7544
2027																			126.39	353.246	632.656	933.946	1227.73	1485.83	1683.74	1803.5	1836.14	1782.76	1654.03	1468.11	1247.35	1014.64	790.135	588.891	419.891	286.275	186.518	245.792	166.078	108.048	67.6494
2028																				141.945	396.871	711.356	1051.51	1384.94	1680.46	1910.66	2055.06	2102.72	2053.67	1918.5	1716.28	1471.24	1208.78	951.846	718.19	519.044	359.133	237.769	284.985	192.561	125.278
2029																					130.239	364.95	657.239	979.136	1304.36	1607.19	1863.76	2054.23	2164.79	2189.26	2129.66	1995.68	1803.11	1571.52	1321.5	1072.19	839.207	633.501	461.063	323.397	218.515
2030																						144.937	406.134	731.407	1089.63	1451.56	1788.56	2074.09	2286.04	2409.08	2436.31	2369.99	2220.89	2006.59	1748.86	1470.63	1193.19	933.91	704.99	513.093	359.892
2031																							144.662	405.363	730.019	1087.56	1448.8	1785.16	2070.15	2281.7	2404.51	2431.69	2365.49	2216.67	2002.78	1745.54	1467.84	1190.92	932.138	703.652	512.12
2032																								144.379	404.571	728.594	1085.44	1445.97	1781.68	2066.11	2277.25	2399.81	2426.94	2360.87	2212.34	1998.87	1742.13	1464.98	1188.6	930.318	702.278
2033																									144.089	403.759	727.13	1083.26	1443.07	1778.1	2061.96	2272.67	2394.99	2422.07	2356.13	2207.9	1994.86	1738.63	1462.03	1186.21	928.449
2034																										143.792	402.925	725.629	1081.02	1440.09	1774.43	2057.7	2267.98	2390.05	2417.07	2351.26	2203.34	1990.74	1735.04	1459.02	1183.76
2035																											143.487	402.071	724.09	1078.73	1437.04	1770.66	2053.34	2263.17	2384.98	2411.94	2346.28	2198.67	1986.52	1731.36	1455.92
2036																												168.544	472.284	850.538	1267.11	1687.99	2079.87	2411.91	2658.39	2801.47	2833.14	2756.01	2582.62	2333.42	2033.71
2037																													193.808	543.077	978.028	1457.04	1941.01	2391.64	2773.44	3056.87	3221.39	3257.81	3169.12	2969.74	2683.19
2038																														219.278	614.449	1106.56	1648.53	2196.1	2705.95	3137.93	3458.6	3644.75	3685.95	3585.61	3360.03
2039																															244.955	686.4	1236.14	1841.57	2453.26	3022.81	3505.38	3863.6	4071.54	4117.57	4005.48
2040																																270.839	758.93	1366.76	2036.16	2712.48	3342.22	3875.78	4271.86	4501.77	4552.67
2041																																	303.029	849.131	1529.2	2278.16	3034.87	3739.46	4336.43	4779.58	5036.82
2042																																		335.482	940.07	1692.97	2522.15	3359.89	4139.94	4800.85	5291.45
2043																																			368.198	1031.75	1858.07	2768.11	3687.55	4543.67	5269.02
2044																																				401.178	1124.16	2024.5	3016.04	4017.85	4950.64
2045																																					434.42	1217.31	2192.25	3265.96	4350.77
2046																																						457.382	1281.65	2308.13	3438.59
2047																																							480.529	1346.51	2424.94
2048																																								503.862	1411.89
2049																																									527.38
2050
EOL Battery Packs-thousands number		0.21262	1.10995	3.9575	8.59369	16.1931	29.8565	50.465	79.2796	121.231	191.173	297.721	434.944	602.594	811.627	1086.9	1471.14	2014.7	2758.64	3733.17	4930.26	6334.74	7916.2	9627.04	11419.8	13244.1	15049.5	16826.9	18595.7	20399.5	22265.1	24238	26401.4	28816.1	31537.3	34609.2	38050.1	41850.5	45994.3	50315.3	54940.2

## Sheet: EOL_STOCK_by_age_of_disposal
Age of disposal
	year	2011	2012	2013	2014	2015	2016	2017	2018	2019	2020	2021	2022	2023	2024	2025	2026	2027	2028	2029	2030	2031	2032	2033	2034	2035	2036	2037	2038	2039	2040	2041	2042	2043	2044	2045	2046	2047	2048	2049	2050
1		0.21262	0.521716	1.48198	0.481901	2.17678	4.50087	3.5967	5.2573	9.96394	22.1788	21.3079	13.3159	21.6936	35.3316	56.219	85.6139	111.359	126.39	141.945	130.239	144.937	144.662	144.379	144.089	143.792	143.487	168.544	193.808	219.278	244.955	270.839	303.029	335.482	368.198	401.178	434.42	457.382	480.529	503.862	527.38
2			0.58823	1.44465	4.10707	1.33657	6.04192	12.5016	9.99686	14.6217	27.7287	61.7571	59.3645	37.1179	60.5005	98.5818	156.932	239.09	311.116	353.246	396.871	364.95	406.134	405.363	404.571	403.759	402.925	402.071	472.284	543.077	614.449	686.4	758.93	849.131	940.07	1031.75	1124.16	1217.31	1281.65	1346.51	1411.89
3				1.03088	2.53654	7.22414	2.35493	10.6624	22.0953	17.6938	25.9148	49.2085	109.731	105.603	66.1022	107.858	175.925	280.324	427.471	556.735	632.656	711.356	657.239	731.407	730.019	728.594	727.13	725.629	724.09	850.538	978.028	1106.56	1236.14	1366.76	1529.2	1692.97	1858.07	2024.5	2192.25	2308.13	2424.94
4					1.46818	3.62383	10.3512	3.38371	15.3608	31.9113	25.6151	37.6009	71.5513	159.878	154.16	96.6739	158.017	258.168	412.028	629.262	820.733	933.946	1051.51	979.136	1089.63	1087.56	1085.44	1083.26	1081.02	1078.73	1267.11	1457.04	1648.53	1841.57	2036.16	2278.16	2522.15	2768.11	3016.04	3265.96	3438.59
5						1.83174	4.54177	13.029	4.27639	19.4879	40.6328	32.7285	48.2002	92.0065	206.192	199.378	125.364	205.435	336.456	538.216	823.798	1076.73	1227.73	1384.94	1304.36	1451.56	1448.8	1445.97	1443.07	1440.09	1437.04	1687.99	1941.01	2196.1	2453.26	2712.48	3034.87	3359.89	3687.55	4017.85	4350.77
6							2.06578	5.15356	14.87	4.90744	22.48	47.1022	38.1166	56.3842	108.081	243.185	236.042	148.955	244.934	402.462	645.819	991.448	1299.55	1485.83	1680.46	1607.19	1788.56	1785.16	1781.68	1778.1	1774.43	1770.66	2079.87	2391.64	2705.95	3022.81	3342.22	3739.46	4139.94	4543.67	4950.64
7								2.13807	5.3761	15.628	5.19403	23.9518	50.5039	41.1146	61.1653	117.88	266.595	260.028	164.854	272.278	449.28	723.846	1115.5	1467.51	1683.74	1910.66	1863.76	2074.09	2070.15	2066.11	2061.96	2057.7	2053.34	2411.91	2773.44	3137.93	3505.38	3875.78	4336.43	4800.85	5269.02
8									2.04683	5.19717	15.2478	5.11207	23.7693	50.5125	41.4277	62.0663	120.418	274.07	268.939	171.486	284.786	472.377	764.853	1184.3	1565.1	1803.5	2055.06	2054.23	2286.04	2281.7	2277.25	2272.67	2267.98	2263.17	2658.39	3056.87	3458.6	3863.6	4271.86	4779.58	5291.45
9										1.8198	4.67542	13.8705	4.6995	22.0697	47.3453	39.1791	59.1978	115.782	265.545	262.479	168.532	281.734	470.263	766.015	1192.91	1585.12	1836.14	2102.72	2164.79	2409.08	2404.51	2399.81	2394.99	2390.05	2384.98	2801.47	3221.39	3644.75	4071.54	4501.77	5036.82
10											1.5055	3.92212	11.7897	4.04445	19.2183	41.6904	34.8661	53.2121	105.071	243.17	242.44	156.945	264.42	444.657	729.458	1143.69	1529.57	1782.76	2053.67	2189.26	2436.31	2431.69	2426.94	2422.07	2417.07	2411.94	2833.14	3257.81	3685.95	4117.57	4552.67
11												1.15971	3.07049	9.37179	3.26177	15.7125	34.5296	29.2342	45.1398	90.1235	210.781	212.26	138.723	235.846	400.048	661.705	1045.65	1408.99	1654.03	1918.5	2129.66	2369.99	2365.49	2360.87	2356.13	2351.26	2346.28	2756.01	3169.12	3585.61	4005.48
12													0.831708	2.24324	6.96777	2.46555	12.0646	26.9095	23.1056	36.1564	73.1092	173.061	176.285	116.475	200.09	342.774	572.349	912.636	1240.37	1468.11	1716.28	1995.68	2220.89	2216.67	2212.34	2207.9	2203.34	2198.67	2582.62	2969.74	3360.03
13														0.554976	1.52861	4.84317	1.74621	8.69776	19.7291	17.2126	27.3455	56.0937	134.609	138.909	92.9212	161.518	279.819	472.255	760.759	1044.09	1247.35	1471.24	1803.11	2006.59	2002.78	1998.87	1994.86	1990.74	1986.52	2333.42	2683.19
14															0.344222	0.970723	3.14483	1.158	5.88401	13.601	12.0805	19.521	40.6945	99.1637	103.834	70.4288	124.05	217.63	371.736	605.733	840.469	1014.64	1208.78	1571.52	1748.86	1745.54	1742.13	1738.63	1735.04	1731.36	2033.71
15																0.198219	0.573842	1.90571	0.718366	3.73204	8.8099	7.98249	13.1452	27.8996	69.1552	73.5969	50.6964	90.6169	161.221	279.088	460.603	646.929	790.135	951.846	1321.5	1470.63	1467.84	1464.98	1462.03	1459.02	1455.92
16																	0.10583	0.315388	1.07647	0.41643	2.21712	5.35676	4.96173	8.34326	18.0628	45.6249	49.4339	34.6382	62.9285	113.707	199.766	334.372	475.998	588.891	718.19	1072.19	1193.19	1190.92	1188.6	1186.21	1183.76
17																		0.0523116	0.160939	0.566087	0.225308	1.23231	3.05429	2.89831	4.98672	11.0339	28.4538	31.4426	22.4486	41.5179	76.3069	136.253	231.621	334.636	419.891	519.044	839.207	933.91	932.138	930.318	928.449
18																			0.0239031	0.076141	0.276765	0.113632	0.64005	1.6312	1.58933	2.80395	6.35364	16.7594	18.9226	13.7894	26.0051	48.692	88.4986	153.007	224.657	286.275	359.133	633.501	704.99	703.652	702.278
19																				0.0100808	0.0333484	0.125625	0.0533498	0.310264	0.815034	0.817248	1.48164	3.44534	9.31425	10.7653	8.02146	15.4516	29.5219	54.7001	96.3267	143.938	186.518	237.769	461.063	513.093	512.12
20																					0.223554	0.571305	1.68908	0.571305	2.68265	5.76273	4.78158	7.25309	14.2578	32.8997	32.7496	21.1951	35.7424	60.2285	99.1082	156.015	209.68	245.792	284.985	323.397	359.892
21																						0.151053	0.386023	1.14129	0.386023	1.81263	3.8938	3.23085	4.90082	9.6338	22.2299	22.1285	14.3212	24.1507	40.6956	66.9661	105.417	141.678	166.078	192.561	218.515
22																							0.098273	0.251142	0.742507	0.251142	1.17928	2.53326	2.10195	3.18841	6.26763	14.4625	14.3965	9.31721	15.7121	26.476	43.5673	68.5832	92.1739	108.048	125.278
23																								0.061529	0.157241	0.464886	0.157241	0.738348	1.58608	1.31604	1.99627	3.92418	9.05501	9.01371	5.83353	9.83741	16.5767	27.2776	42.9401	57.7103	67.6494
24																									0.037054	0.0946937	0.279964	0.0946937	0.444649	0.955171	0.792545	1.2022	2.36322	5.45312	5.42824	3.51308	5.9243	9.98285	16.4272	25.8594	34.7544
25																										0.0214519	0.0548215	0.162081	0.0548215	0.257423	0.552982	0.458832	0.695995	1.36815	3.15701	3.1426	2.03385	3.42979	5.77943	9.51027	14.971
	EOL_stock	0.21262	1.10995	3.9575	8.59369	16.1931	29.8565	50.465	79.2796	121.231	191.173	297.721	434.944	602.594	811.627	1086.9	1471.14	2014.7	2758.64	3733.17	4930.26	6334.74	7916.2	9627.04	11419.8	13244.1	15049.5	16826.9	18595.7	20399.5	22265.1	24238	26401.4	28816.1	31537.3	34609.2	38050.1	41850.5	45994.3	50315.3	54940.2

## Sheet: Reuse_Units
Alpha	Betha
1.5	0.11
							SOH at disposal
DOD	Dist. Of DOD	Percentage likelihood	Age of disposal	EOL -KM		Age of disposal	1	2	3	4	5	6	7	8	9	10	11	12
0.0001	0.411141	0.764298	1	38288			95.2238	93.2454	91.7273	90.4475	89.32	88.3006	87.3632	86.4907	85.6713	84.8962	84.159	83.4546
0.018395	5.20778	9.68111	2	54892.8			94.7	92.6	91.4561	90.0896	88.9	87.8839	86.9027	85.9256	85.0261	84.2302	83.4658	82.8772
0.03669	6.49556	12.075	3	62696			94.6	92.42	91.1849	89.7317	88.48	87.4671	86.4422	85.3628	84.3808	83.5641	82.7727	82.2997
0.054985	6.77081	12.5867	4	79000			94.45	92.24	90.9137	89.3738	88.06	87.0503	85.9816	84.8	83.7356	82.8981	82.0795	81.7223
0.07328	6.46179	12.0123	5	94875.2			94.3	92.06	90.6424	89.0158	87.64	86.6335	85.5211	84.2	83.0904	82.2321	81.3863	81.1449
0.091575	5.82113	10.8213	6	99000			94.15	91.88	90.3712	88.6579	87.22	86.2168	85.0605	83.65	82.4452	81.566	80.6932	80.5674
0.10987	5.02247	9.33661	7	110904			94	91.7	90.1	88.3	86.8	85.8	84.6	83.1	81.8	80.9	80	79.99
0.128165	4.18495	7.77969	8	125000			93.82	91.4071	89.7714	87.9	86.3143	85.385	84.1071	82.6	81.1	80.0667	79.1667	79.1836
0.14646	3.38559	6.29371	9	150674			93.64	91.1143	89.4429	87.5	85.8286	84.97	83.6143	82.15	80.4	79.2333	78.3333	78.3771
0.164755	2.669	4.96158	10	158912			93.46	90.8214	89.1143	87.1	85.3429	84.555	83.1214	81.6333	79.7	78.4	77.5	77.5707
0.18305	2.05589	3.82184	11	169459			93.28	90.5286	88.7857	86.7	84.8571	84.14	82.6286	81.1167	79	77.7091	76.8173	76.7643
0.201345	1.55054	2.8824	12	172160			93.1	90.2357	88.4571	86.3	84.3714	83.725	82.1357	80.6	78.3	77.0182	76.1345	75.9579
0.21964	1.14684	2.13193					92.8778	89.9429	88.1286	85.9	83.8857	83.31	81.6429	80	77.6	76.3273	75.4518	75.1514
0.237935	0.832971	1.54847					92.6556	89.65	87.8	85.5	83.4	82.895	81.15	79.4	76.9125	75.6364	74.7691	74.345
0.25623	0.594761	1.10564					92.4333	89.3571	87.4714	85.1	82.9143	82.48	80.6571	78.8	76.225	74.9455	74.0864	73.5386
0.274525	0.417868	0.776805					92.2111	89.0643	87.1429	84.7	82.4286	82.065	80.1643	78.3	75.5375	74.2545	73.4036	72.7321
0.29282	0.289111	0.537449					91.9889	88.7714	86.8143	84.3	81.9429	81.65	79.6714	77.8	74.85	73.5636	72.7209	71.9257
0.311115	0.197114	0.366429					91.7667	88.4786	86.4857	83.9	81.4571	81.235	79.1786	77.1	74.1625	72.8727	72.0382	71.1193
0.32941	0.132513	0.246338					91.5444	88.1857	86.1571	83.5	80.9714	80.82	78.6857	76.4	73.475	72.1818	71.3555	70.3129
0.347705	0.0878867	0.163379					91.3222	87.8929	85.8286	83.1	80.4857	80.405	78.1929	75.7	72.7875	71.4909	70.6727	69.5064
0.366	0.0575328	0.106952					91.1	87.6	85.5	82.7	80	79.99	77.7	75	72.1	70.8	69.99	68.7
							*red shows the EOL threshold				*green shows 90% capacity threshold					*orange shows 85% capacity threshold
Age of disposal	2011	2012	2013	2014	2015	2016	2017	2018	2019	2020	2021	2022	2023	2024	2025	2026	2027	2028	2029	2030	2031	2032	2033	2034	2035	2036	2037	2038	2039	2040	2041	2042	2043	2044	2045	2046	2047	2048	2049	2050
1	0.21262	0.521716	1.48198	0.481901	2.17678	4.50087	3.5967	5.2573	9.96394	22.1788	21.3079	13.3159	21.6936	35.3316	56.219	85.6139	111.359	126.39	141.945	130.239	144.937	144.662	144.379	144.089	143.792	143.487	168.544	193.808	219.278	244.955	270.839	303.029	335.482	368.198	401.178	434.42	457.382	480.529	503.862	527.38
2	0	0.547152	1.34376	3.82026	1.24323	5.61999	11.6285	9.29874	13.6006	25.7923	57.4444	55.2188	34.5258	56.2755	91.6974	145.973	222.393	289.389	328.578	369.156	339.464	377.772	377.055	376.319	375.563	374.787	373.992	439.303	505.152	571.539	638.466	705.931	789.833	874.421	959.695	1045.65	1132.3	1192.15	1252.48	1313.3
3			0.693548	1.70652	4.86021	1.58434	7.17337	14.8651	11.904	17.4348	33.1062	73.8243	71.047	44.4719	72.5639	118.357	188.595	287.591	374.557	425.634	478.582	442.173	492.071	491.138	490.179	489.194	488.184	487.149	572.22	657.992	744.466	831.642	919.52	1028.81	1138.99	1250.06	1362.03	1474.89	1552.85	1631.44
4			0	0.153357	0.378524	1.08123	0.353443	1.6045	3.33327	2.6756	3.92756	7.47382	16.6999	16.1027	10.098	16.5055	26.9667	43.038	65.729	85.7289	97.5544	109.835	102.275	113.816	113.6	113.378	113.151	112.917	112.678	132.355	152.194	172.195	192.359	212.685	237.963	263.448	289.14	315.038	341.143	359.174
5			0	0	0.014	0.0347127	0.0995807	0.0326843	0.148946	0.310555	0.250143	0.368393	0.703204	1.57592	1.52384	0.958158	1.57014	2.57152	4.11357	6.29627	8.22942	9.38348	10.5851	9.96923	11.0942	11.0732	11.0516	11.0294	11.0066	10.9832	12.9012	14.8351	16.7847	18.7502	20.7315	23.1955	25.6796	28.1839	30.7083	33.2529
6			0	0	0	0	0	0	0	0	0	0	0	0	0	0	0	0	0	0	0	0	0	0	0	0	0	0	0	0	0	0	0	0	0	0	0	0	0	0
7			0	0	0	0	0	0	0	0	0	0	0	0	0	0	0	0	0	0	0	0	0	0	0	0	0	0	0	0	0	0	0	0	0	0	0	0	0	0
8			0	0	0	0	0	0	0	0	0	0	0	0	0	0	0	0	0	0	0	0	0	0	0	0	0	0	0	0	0	0	0	0	0	0	0	0	0	0
9			0	0	0	0	0	0	0	0	0	0	0	0	0	0	0	0	0	0	0	0	0	0	0	0	0	0	0	0	0	0	0	0	0	0	0	0	0	0
10			0	0	0	0	0	0	0	0	0	0	0	0	0	0	0	0	0	0	0	0	0	0	0	0	0	0	0	0	0	0	0	0	0	0	0	0	0	0
11			0	0	0	0	0	0	0	0	0	0	0	0	0	0	0	0	0	0	0	0	0	0	0	0	0	0	0	0	0	0	0	0	0	0	0	0	0	0
12			0	0	0	0	0	0	0	0	0	0	0	0	0	0	0	0	0	0	0	0	0	0	0	0	0	0	0	0	0	0	0	0	0	0	0	0	0	0
Reuse - above 90% capacity	0.21262	1.06887	3.51929	6.16204	8.67276	12.8211	22.8516	31.0584	38.9507	68.3921	116.036	150.201	144.67	153.758	232.102	367.408	550.884	748.98	914.922	1017.05	1068.77	1083.83	1126.37	1135.33	1134.23	1131.92	1154.92	1244.21	1420.33	1617.82	1818.87	2027.63	2253.98	2502.86	2758.56	3016.78	3266.53	3490.79	3681.04	3864.54
0	2011	2012	2013	2014	2015	2016	2017	2018	2019	2020	2021	2022	2023	2024	2025	2026	2027	2028	2029	2030	2031	2032	2033	2034	2035	2036	2037	2038	2039	2040	2041	2042	2043	2044	2045	2046	2047	2048	2049	2050
1	0	0	0	0	0	0	0	0	0	0	0	0	0	0	0	0	0	0	0	0	0	0	0	0	0	0	0	0	0	0	0	0	0	0	0	0	0	0	0	0
2	0	0.0410784	0.100886	0.286813	0.0933381	0.421931	0.873033	0.69812	1.02109	1.93641	4.31275	4.14566	2.59209	4.22499	6.88436	10.9592	16.6966	21.7264	24.6686	27.7151	25.4859	28.3619	28.3081	28.2528	28.1961	28.1379	28.0782	32.9815	37.9252	42.9094	47.934	52.9991	59.2982	65.6488	72.0509	78.5045	85.0095	89.5028	94.0324	98.5982
3	0	0	0.33733	0.830023	2.36393	0.770596	3.48901	7.23016	5.78989	8.48	16.1023	35.9069	34.5561	21.6304	35.2939	57.5671	91.7293	139.88	182.178	207.022	232.774	215.066	239.336	238.881	238.415	237.936	237.445	236.941	278.318	320.037	362.096	404.497	447.239	500.395	553.985	608.01	662.469	717.363	755.28	793.503
4	0	0	0	0.0484939	0.119695	0.3419	0.111764	0.507367	1.05403	0.846065	1.24195	2.36333	5.28075	5.09191	3.19313	5.21929	8.52728	13.6092	20.7845	27.1088	30.8482	34.7315	32.3408	35.9904	35.9221	35.852	35.78	35.7061	35.6304	41.8525	48.1259	54.4507	60.8268	67.2542	75.2476	83.3063	91.4304	99.6197	107.874	3438.59
5	0	0	0	0	0.341606	0.847005	2.42981	0.797513	3.63435	7.57769	6.1036	8.98896	17.1585	38.4532	37.1824	23.3795	38.3121	62.7463	100.373	153.632	200.802	228.961	258.281	243.254	270.704	270.191	269.663	269.121	268.566	267.996	314.796	361.982	409.555	457.513	505.857	565.98	626.594	687.7	749.297	811.385
6	0	0	0	0	0	0.515265	1.28545	3.70901	1.22406	5.60717	11.7487	9.50739	14.0639	26.9586	60.6574	58.8757	37.1537	61.0936	100.386	161.086	247.296	324.146	370.609	419.156	400.88	446.118	445.272	444.402	443.51	442.594	441.655	518.782	596.544	674.943	753.977	833.648	932.73	1032.62	1133.32	1234.83
7	0	0	0	0	0	0	1.10025	2.76654	8.04216	2.67285	12.3256	25.9893	21.1576	31.4757	60.661	137.19	133.81	84.8341	140.114	231.199	372.491	574.036	755.179	866.45	983.228	959.092	1067.32	1065.3	1063.22	1061.08	1058.89	1056.65	1241.17	1427.21	1614.78	1803.87	1994.48	2231.53	2470.51	2711.44
8	0	0	0	0	0	0		1.73373	4.40216	12.9154	4.33008	20.1333	42.7857	35.0905	52.5721	101.998	232.146	227.799	145.254	241.223	400.118	647.854	1003.14	1325.69	1527.62	1740.7	1739.99	1936.35	1932.67	1928.9	1925.03	1921.05	1916.98	2251.74	2589.26	2929.54	3272.59	3618.4	4048.45	4482.03
9	0	0	0	0	0	0	0		1.46651	3.76775	11.1778	3.78716	17.7852	38.1539	31.573	47.7054	93.3049	213.994	211.522	135.814	227.039	378.969	617.304	961.326	1277.39	1479.68	1694.51	1744.53	1941.39	1937.71	1933.92	1930.04	1926.05	1921.97	2257.6	2596	2937.17	3281.11	3627.82	4059
10	0	0	0	0	0	0	0	0	0	0	0	0	0	0	0	0	0	0	0	0	0	0	0	0	0	0	0	0	0	0	0	0	0	0	0	0	0	0	0	0
11	0	0	0	0	0	0	0	0	0	0	0	0	0	0	0	0	0	0	0	0	0	0	0	0	0	0	0	0	0	0	0	0	0	0	0	0	0	0	0	0
12	0	0	0	0	0	0	0	0	0	0	0	0	0	0	0	0	0	0	0	0	0	0	0	0	0	0	0	0	0	0	0	0	0	0	0	0	0	0	0	0
Reuse - between 85% to 90% capacity	0	0.0410784	0.438216	1.16533	2.91857	2.8967	9.28932	17.4424	26.6342	43.8033	67.3428	110.822	155.38	201.079	288.017	442.894	651.68	825.683	925.281	1184.8	1736.85	2432.12	3304.5	4119	4762.36	5197.7	5518.07	5765.32	6001.23	6043.08	6132.45	6300.45	6657.66	7366.67	8422.76	9498.86	10602.5	11757.8	12986.6	17629.4
0	2011	2012	2013	2014	2015	2016	2017	2018	2019	2020	2021	2022	2023	2024	2025	2026	2027	2028	2029	2030	2031	2032	2033	2034	2035	2036	2037	2038	2039	2040	2041	2042	2043	2044	2045	2046	2047	2048	2049	2050
1	0	0	0	0	0	0	0	0	0	0	0	0	0	0	0	0	0	0	0	0	0	0	0	0	0	0	0	0	0	0	0	0	0	0	0	0	0	0	0	0
2	0	0	0	0	0	0	0	0	0	0	0	0	0	0	0	0	0	0	0	0	0	0	0	0	0	0	0	0	0	0	0	0	0	0	0	0	0	0	0	0
3	0	0	0	0	0	0	0	0	0	0	0	0	0	0	0	0	0	0	0	0	0	0	0	0	0	0	0	0	0	0	0	0	0	0	0	0	0	0	0	0
4	0	0	0	0.0322611	0.0796282	0.227453	0.0743521	0.337531	0.701204	0.562854	0.826223	1.57223	3.51308	3.38744	2.12427	3.47219	5.67286	9.05369	13.8271	18.0344	20.5221	23.1055	21.5151	23.943	23.8976	23.8509	23.803	23.7539	23.7035	27.8428	32.0163	36.2239	40.4657	44.7416	50.0593	55.4204	60.825	66.2731	71.7646	75.5578
5	0	0	0	0	0.250722	0.621661	1.78337	0.585336	2.66744	5.56166	4.47975	6.59747	12.5935	28.2228	27.2901	17.1594	28.1192	46.0528	73.669	112.758	147.379	168.047	189.566	178.537	198.684	198.307	197.92	197.522	197.114	196.696	231.045	265.678	300.594	335.793	371.275	415.402	459.89	504.739	549.948	595.518
6	0	0	0	0	0	0.385251	0.961098	2.77314	0.9152	4.19235	8.7842	7.10844	10.5152	20.1563	45.3521	44.0199	27.7789	45.6782	75.056	120.44	184.897	242.356	277.096	313.393	299.728	333.552	332.919	332.269	331.601	330.917	330.215	387.88	446.021	504.638	563.73	623.299	697.38	772.066	847.358	923.256
7	0	0	0	0	0	0	0.868885	2.18478	6.35101	2.11078	9.73371	20.5241	16.7084	24.8568	47.9048	108.341	105.672	66.9947	110.65	182.581	294.162	453.324	596.376	684.248	776.469	757.409	842.881	841.282	839.639	837.952	836.222	834.449	980.168	1127.09	1275.21	1424.54	1575.07	1762.27	1951	2141.26
8	0	0	0	0	0	0		1.48658	3.7746	11.0742	3.7128	17.2632	36.6863	30.0881	45.0776	87.4574	199.052	195.325	124.547	206.835	343.078	555.498	860.136	1136.7	1309.85	1492.55	1491.94	1660.31	1657.16	1653.92	1650.6	1647.19	1643.7	1930.74	2220.14	2511.92	2806.06	3102.57	3471.32	3843.08
9	0	0	0	0	0	0	0		1.29033	3.31512	9.83496	3.3322	15.6486	33.5704	27.7801	41.9744	82.0959	188.286	186.112	119.498	199.764	333.442	543.146	845.839	1123.94	1301.92	1490.94	1534.95	1708.17	1704.92	1701.59	1698.18	1694.67	1691.08	1986.39	2284.14	2584.32	2886.94	3192	3571.38
10	0	0	0	0	0	0	0	0	0	1.12999	2.94383	8.849	3.03565	14.4247	31.2916	26.1695	39.9394	78.8633	182.516	181.968	117.799	198.466	333.746	547.509	858.423	1148.05	1338.09	1541.43	1643.19	1828.63	1825.16	1821.59	1817.93	1814.18	1810.33	2126.47	2445.22	2766.57	3090.53	3417.1
11	0	0	0	0	0	0	0	0	0	0	0.78022	2.06575	6.30509	2.19443	10.571	23.2306	19.668	30.3689	60.6327	141.808	142.803	93.3289	158.671	269.142	445.178	703.489	947.93	1112.79	1290.71	1432.78	1594.47	1591.44	1588.33	1585.14	1581.87	1578.51	1854.17	2132.1	2412.3	2694.78
12	0	0	0	0	0	0	0	0	0	0	0	0.481898	1.29975	4.03718	1.42856	6.99031	15.5916	13.3876	20.9493	42.36	100.273	102.141	67.4863	115.934	198.606	331.624	528.788	718.682	850.636	994.425	1156.31	1286.8	1284.36	1281.85	1279.27	1276.63	1273.93	1496.39	1720.69	1946.83
Reuse - between 80% to 85% capacity	0	0	0	0.0322611	0.330351	1.23436	3.6877	7.36736	15.6998	27.947	41.0957	67.7943	106.306	160.938	238.82	358.814	523.59	674.01	847.959	1126.28	1550.68	2169.71	3047.74	4115.25	5234.77	6290.75	7195.21	7962.98	8541.92	9008.08	9357.62	9569.43	9796.24	10315.2	11138.3	12296.3	13756.9	15489.9	17306.9	19208.8
Resue abovbe 80%	0.21262	1.10995	3.9575	7.35963	11.9217	16.9522	35.8286	55.8682	81.2848	140.142	224.475	328.818	406.355	515.775	758.939	1169.12	1726.15	2248.67	2688.16	3328.14	4356.3	5685.66	7478.6	9369.58	11131.4	12620.4	13868.2	14972.5	15963.5	16669	17308.9	17897.5	18707.9	20184.8	22319.6	24812	27625.9	30738.6	33974.6	40702.7
Recycle	0	0	0	1.23407	4.2714	12.9043	14.6364	23.4114	39.9464	51.0306	73.2467	106.127	196.239	295.852	327.961	302.019	288.543	509.969	1045.01	1602.12	1978.44	2230.54	2148.44	2050.27	2112.79	2429.13	2958.65	3623.17	4436.01	5596.09	6929.04	8503.87	10108.2	11352.5	12289.6	13238.1	14224.6	15255.7	16340.7	14237.5
